# Supplementary material for: Reduced platelet glycoprotein Ibα shedding accelerates thrombopoiesis and COX-1 recovery: implications for aspirin dosing regimen
Source: PubMed Central journal article supplement — Haematologica. 2022 Dec 22;108(4):1141–57. doi: 10.3324/haematol.2022.281006 (PMC10071111; doi:10.3324/haematol.2022.281006), 2022-12-22
Supplement: 2022_281006_SIMEONE_SUPPL.pdf [file 2022_281006_SIMEONE_SUPPL.pdf]

# Reduced platelet glycoprotein Ib $\alpha$ shedding accelerates thrombopoiesis and COX-1 recovery: implications for aspirin dosing regimen

Paola Simeone,<sup>1\*</sup> Rossella Liani,<sup>1\*</sup> Romina Tripaldi,<sup>1</sup> Sonia Ciotti,<sup>1</sup> Antonio Recchiuti,<sup>2</sup> Vittorio Abbonante,<sup>3,4</sup> Benedetta Porro,<sup>5</sup> Piero Del Boccio,<sup>6</sup> Augusto di Castelnuovo,<sup>7</sup> Paola Lanuti,<sup>1</sup> Marina Camera,<sup>5,8</sup> Damiana Pieragostino,<sup>9</sup> Melissa Lee-Sundlov,<sup>10</sup> Myriam Luongo,<sup>11</sup> Raffaella Auciello,<sup>12</sup> Giuseppina Bologna,<sup>1</sup> Maria Concetta Cufaro,<sup>9</sup> Elena Tremoli,<sup>13</sup> Karin M. Hoffmeister,<sup>10,14</sup> Francesco Cipollone,<sup>1</sup> Alessandra Balduini<sup>3</sup> and Francesca Santilli<sup>1</sup>

<sup>1</sup>Department of Medicine and Aging Sciences, Center for Advanced Studies and Technology (CAST), University of Chieti, Chieti, Italy; <sup>2</sup>Department of Medical, Oral, and Biotechnological Science, Center for Advanced Studies and Technology (CAST), Chieti, Italy; <sup>3</sup>Department of Molecular Medicine, University of Pavia, Pavia, Italy; <sup>4</sup>Department of Health Sciences, Magna Graecia University of Catanzaro, Catanzaro, Italy; <sup>5</sup>Centro Cardiologico Monzino IRCCS, Milan, Italy; <sup>6</sup>Department of Pharmacology, Center for Advanced Studies and Technology (CAST), Chieti, Italy; <sup>7</sup>Mediterranea Cardiocentro, Napoli, Italy; <sup>8</sup>Department of Pharmaceutical Sciences, Università degli Studi di Milano, Milan, Italy; <sup>9</sup>Department of Innovative Technologies in Medicine and Dentistry, Center for Advanced Studies and Technology (CAST), Chieti, Italy; <sup>10</sup>Versiti Translational Glycomics Center and Versiti Blood Research Institute, Milwaukee, WI, USA; <sup>11</sup>Immunotransfusion Service, Clinical Hematology of Chieti University Hospital, Chieti, Italy; <sup>12</sup>Clinical Pathology of Chieti University Hospital, Chieti, Italy; <sup>13</sup>Maria Cecilia Hospital, Cotignola, Italy and <sup>14</sup>Departments of Biochemistry and Medicine, Medical College of Wisconsin, Milwaukee, WI, USA

*\*PS and RL contributed equally as co-first authors.*

**Correspondence:** F. Santilli  
[francesca.santilli@unich.it](mailto:francesca.santilli@unich.it)

**Received:** March 10, 2022.

**Accepted:** December 5, 2022.

**Early view:** December 22, 2022.

<https://doi.org/10.3324/haematol.2022.281006>

©2023 Ferrata Storti Foundation

Published under a CC BY-NC license

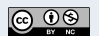

## Supplementary extended study participants, methods and results Appendix

**Title: Reduced platelet glycoprotein Iba shedding accelerates thrombopoiesis and COX-1 recovery: implications for aspirin dosing regimen**

**Short Title: Platelet lifespan imbalance and aspirin response**

**Online Supplementary Methods: pages 2-8**

**Online Supplementary Results: page 9-10**

**Online Supplementary References: page 11**

**Online Supplementary Figure S1: page 12**

**Online Supplementary Figure S2: page 13**

**Online Supplementary Figure S3: page 14**

**Online Supplementary Figure S4: page 15**

**Online Supplementary Figure S5: page 16**

**Online Supplementary Table S1: pages 17-19**

**Online Supplementary Table S2: page 20-21**

**Online Supplementary Table S3: pages 22**

**Online Supplementary Table S4: pages 23-25**

**Online Supplementary Table S5: pages 26-28**

**Online Supplementary Table S6: page 29-31**

**Online Supplementary Table S7: page 32**

## **Online Supplementary Methods**

### *Study participants*

For all patients, inclusion criteria included: age between 45 and 80 years, body mass index (BMI) between 20 and 45 kg/m<sup>2</sup>. A diagnosis of overt type 2 diabetes mellitus (T2DM), according with the ADA criteria<sup>1</sup>, was also required for the T2DM group.

Exclusion criteria were poorly controlled hypertension or hypercholesterolemia, smoking, pregnancy or lactation, impaired liver or renal function, history of malignant neoplasms (diagnosed and treated within the last 5 years), history of malabsorption, regular (daily) consumption of alcohol, or treatment with non-steroidal anti-inflammatory drugs (NSAIDs), anticoagulants or other antiplatelet drugs. Type 1 diabetes was suspected and excluded with islet autoantibodies evaluation (anti-glutamic acid decarboxylase, islet cell cytoplasmic, and IA-2 antibodies), when one of the following applied: family history of type 1 diabetes, age lower than 40, lean phenotype, precocious requirement for insulin therapy. No patient was diagnosed as having MODY (Maturity Onset Diabetes of the Young).

### *Liver Ultrasound*

The grading of liver steatosis has been obtained using a high-resolution ultrasound System (GE Healthcare), equipped with a 3.5-MHz convex- array probe. Subjects were examined in the supine position. Ultrasound features included liver brightness, contrast between the liver and the kidney, US appearance of the intrahepatic vessels, liver parenchyma and diaphragm. Steatosis was graded as follows: absent (score 0) when the echotexture of the liver is normal; mild (score 1), when there is a slight and diffuse increase of liver echogenicity with normal visualization of the diaphragm and of the portal vein wall; moderate (score 2), in case of a moderate increase of liver echogenicity with slightly impaired appearance of the portal vein wall and the diaphragm; severe (score 3), in case of marked increase of liver echogenicity with poor or no visualization of portal vein wall, diaphragm, and posterior part of the right liver lobe<sup>2</sup>. The examinations were assessed by the same operator, to reduce the variability.

### *Biochemical measurements and glycolalicin index (GCI)*

Serum thromboxane B<sub>2</sub> (sTXB<sub>2</sub>) produced during whole blood clotting *ex vivo*<sup>3</sup> was measured with

an enzyme-immunoassay (EIA) (Cayman Chemical, Ann Arbor, MI).<sup>4</sup> Urinary 11-dehydro-TXB<sub>2</sub>, a major TXA<sub>2</sub> metabolite reflecting TXA<sub>2</sub> biosynthesis rate, was measured with validated liquid chromatography–tandem mass spectrometry (LC-MS-MS).<sup>4</sup>

Thrombopoietin (TPO) (R&D Systems, Minneapolis, MN) and glycoalbumin (GA) (Cusabio Technology, Houston, TX), ELISA kits were used on ethylenediamine tetraacetic acid (EDTA) plasma.

The glycoalbumin index (GI), a parameter of platelet destruction,<sup>5,6</sup> was calculated as:  $[GA \text{ concentration } (\mu\text{g/mL}) \times 250 \times 10^9 \text{ platelet/L} / \text{individual platelet count} \times 10^9/\text{L}]$ .<sup>7,5</sup> Normal GI is 0.7 (0.6–0.9).

#### Proteomics data processing and bioinformatics parameters

Proteomics analysis was performed on pooled platelet samples by selecting 10 patients (with or without T2DM) per group according to their homogeneous clinical and demographical parameters. Samples were analyzed in triplicate (third vs. first tertile) by LC-MS/MS and processed using MaxQuant 1.6.6.0 as previously reported.<sup>8,9</sup>

For protein identification and quantification carbamidomethylation of cysteines I was defined as fixed modification, while oxidation of methionines (M), deamidation of asparagines (N) and glutamines (Q) were set as variable modifications. Mass tolerances were set by default to 0.07 Da in the first search and 0.006 Da in the main search, while TOF MS/MS match tolerance was set to 0.05 Da. A retention time tolerance of 0.7 min was used to align any time shift in acquisition between samples. Match-between-runs (MBR) algorithm was used to transfer the peptide identifications from one LC-MS/MS run to all others using its default settings (match window of 0.7 min and alignment time of 20 min). False discovery rate (FDR) at the protein level was set at 2%, on the contrary at peptide level was set at 1%. Intensity-based absolute quantification (iBAQ) was used to quantify protein abundance in each sample in the bioinformatics analysis performed with Perseus,<sup>10</sup> version 1.6.10.50. (Max-Planck Institute for Biochemistry, Martinsried, Germany) uploading the protein groups generated by MaxQuant. Data were log<sub>2</sub> transformed in order to facilitate the calculation of the protein expression. Site only, reverse and contaminant peptides were removed from the dataset. Then, the missing and invalid values were removed.

The minimum number of valid values accepted was set at 2 in at least one treatment condition. In this way we have evaluated not only the different protein expression, but also the presence and absence of proteins between the different clinical conditions. The expression of common proteins between two clinical groups (third vs. first tertile) in both patients without T2DM (Online Supplementary Figure S1A) and with T2DM (Online Supplementary Figure S1B) was evaluated comparing the iBAQ ( $\log_2$  transformed) of the proteins in the density plot with Pearson correlation ( $R^2$ ). A Volcano plot function was used to identify the differentially regulated proteins by performing a T-test with a false discovery rate (FDR) of 0.22 and a  $S_0$  of 0.05 (Online Supplementary Figure S2).

The quality of our proteomic data is evaluated by using Platelet W-b - Systems Biology Workbench. Gene Ontology and Comparison Analysis were performed using Ingenuity Pathway Analysis (IPA, Qiagen, Hilden, Germany) by loading the protein ratio for each comparison (third vs. first tertile) both for patients with T2DM and without T2DM. We considered molecules and/or relationships in all species and a confidence setting as “high predicted” or “experimental observed” (excluding medium predicted). The predicted activation or inhibition of each transcriptional regulator or downstream was inferred by the IPA-generated z-scores<sup>11</sup> (Online Supplementary Figure S2).

### *Immunoprecipitation*

For immunoprecipitation, platelet lysates (200  $\mu$ g of total protein) were precleared by incubation with protein A-Sepharose (Sigma Aldrich). Precleared lysates were incubated with 2  $\mu$ g of anti-14-3-3 $\xi$  antibody (Santa Cruz Biotechnology) for 2 h at 4°C on a rotatory shaker, followed by adding 100  $\mu$ L of 50 mg/ml protein A-Sepharose and incubation for 1 hour at 4°C on a rotatory shaker. Beads were washed three times in lysis buffer and samples were eluted with Laemmli buffer at 95°C for 5 minutes. Protein lysates were subjected to 12% sodium dodecyl sulfate–polyacrylamide gel electrophoresis and transferred to polyvinylidene fluoride membrane.

### *Megakaryocyte maturation*

CD45<sup>+</sup> cells were separated from peripheral blood samples obtained from healthy subjects and patients by immunomagnetic bead selection (Miltenyi Biotech, Bologna, Italy) and cultured in Stem Span

medium (Stem Cell Technologies, Canada) supplemented with 1% L-glutamine, 1% penicillin-streptomycin, 10 ng/mL recombinant human thrombopoietin and 10 ng/mL recombinant human interleukin-11 (PeproTech, London, UK) for 14 days as previously described.<sup>12</sup> To evaluate Mk maturation, at the end of the culture, aliquots of  $50 \times 10^3$  cells were collected, washed in PBS, and double-stained with the FITC-conjugated monoclonal antibody HIP8 against CD41 (eBioscience, ThermoFisher Scientific) and the PE-conjugated monoclonal antibody HIP1 against glycoprotein (GP)Ib $\alpha$  (CD42b, Abcam, Cambridge, UK). Cells were analyzed using a Navios flow cytometer (Beckman Coulter). A minimum of 10,000 events was acquired. Off-line data analysis was performed using the Beckman Coulter Navios software package. The maturation of Mks was measured as the percentage and mean fluorescence intensity of CD41 and GPIb $\alpha$  positive cells.<sup>13</sup>

#### Proplatelet formation (PPF) assay

PPF was investigated in adhesion to fibrinogen according to a previously described protocol<sup>12</sup>. At the end of the culture, large Mks were separated by a bovine serum albumin gradient (3-4%).  $1 \times 10^5$  Mks were allowed to adhere at 37°C and 5% CO<sub>2</sub> for 16 hours onto glass coverslips coated with 100  $\mu$ g/mL fibrinogen (Merck-Millipore, Milan, Italy). Samples were then fixed with 4% paraformaldehyde, permeabilized with 0.5% Triton X-100, blocked with 5% BSA and stained with the anti- $\beta$ 1-tubulin antibody (Abcam). An Alexa Fluor 488-conjugated goat anti-rabbit antibody (Life Technologies, Monza, Italy) was used as secondary antibody. Hoechst was used for counterstaining nuclei. Proplatelet forming Mk were identified by fluorescence microscopy as the  $\beta$ 1-tubulin positive cells displaying at least one proplatelet with respect to the total number of  $\beta$ 1-tubulin positive cells. At least 10 fields per sample were analyzed using an Olympus IX53 microscope (Olympus Deutschland GmbH, Hamburg, Germany).

#### Western Blot Antibodies

The used primary antibodies were: anti-78 kDa glucose-regulated protein (GRP78, 1:1000; clone 76-E6, sc-13539, Santa Cruz Biotechnology), anti- $\beta$ -actin (1:5000; Sigma Aldrich), anti-cyclooxygenase (COX)-1 (1:1000; clone CX111, Cayman Chemical), anti-Rab27B (1:1000; 44813 Cell Signaling), anti-GPIb $\alpha$  (1:10000; EPR6995, ab27901, Abcam), anti- $\alpha$  disintegrin and metalloprotease 17 (ADAM17,

1:1000; Ab2051, Abcam), and anti-neuraminidase (Neu)1 (1:1000; Invitrogen), anti-caspase 3 (Caspase 3, 1:1000; sc-7272, Santa Cruz). The used horseradish peroxidase-conjugated secondary antibodies were: goat anti-mouse (1:3000, Calbiochem) or goat anti-rabbit (1:5000, Calbiochem).

The used lectins were: biotinylated *Erythrina cristagalli* (ECL, 1:3000), and biotinylated *Ricinus communis agglutinin I* (RCA-I, 1:3000) as previously described.<sup>14</sup> Immunoreactive bands were detected by horseradish peroxidase-labeled streptavidin (1:3000).

Finally, the blots were developed using Western Lightning Chemiluminescence Reagent (PerkinElmer) and immunoblot images were acquired with Alliance 4.7 (UVITEC, Cambridge, UK). The intensity of the relevant bands was evaluated using the ImageJ NIH Image Analysis Program.

#### Quantitative Real-time PCR (qRT-PCR)

Platelet RNA was extracted by using Total RNA Purification Kit (Norgen), and the retrotranscription of 500 ng was performed by Omniscript RT Kit (Qiagen). qRT-PCRs were performed using miSCRIPT Syber Green PCR Kit (Qiagen). Primers (5' to 3') used were:

-COX-1 forward TCATCAGGGAGTCTCGGGAG, reverse ATTCCTCCAACCTCTGCTGCC;

-β2-microglobulin forward GCTCGCGCTACTCTCTCTTT, reverse  
TGTCGGATGGATGAAACCCA;

-thrombopoietin (TPO) forward, ACTGCTTCGTGACTCCCATG, reverse  
AGGAGGGATGAGAGGCAAGT;

-cyclophilin (cyclo) A forward, AGTCCATCTATGGGGAGAAATTTG reverse  
GCCTCCACAATATTCATGCCTTC.

#### Platelet Annexin V

Platelet staining for flow cytometry analyses were carried out by adding 5 μL of peripheral blood samples to the reagent mix detailed in Supplementary Table S3.  $1 \times 10^6$  events/sample were acquired by flow cytometry (FACSVerse, BD Biosciences), and data were analyzed using FACSuite v 1.0.6.5230 and FlowJo X v 10.0.7 software (BD Biosciences). Platelets were identified on an FSC-H/SSC-H dot plot and then they were analyzed for their positivity to CD41a. CD41a+ platelets were gated and analyzed for their

Annexin V positivity<sup>15</sup>.

#### Total and platelet derived Annexin V Extracellular vesicles

Extracellular-vesicles, total and platelet derived, for flow cytometry analyses were carried out by adding 5 µL of peripheral blood samples to the reagent mix<sup>15</sup> prepared by adding to 195 µL of binding buffer 1X (BD Biosciences) the dyes and antibodies (1 µL Lyophilic Cationic Dye (LCD) APC 626267 BD Biosciences; 5 µL CD41a BV510 563250 BD Biosciences; 1 µL AnnexinV V450 560506 BD Biosciences) and incubated for 45 minutes (RT, in the dark). Finally, samples were adequately diluted with binding buffer 1X (1:143), and no swarm effects occurred<sup>15</sup> when they were acquired (1 x 10<sup>6</sup> events/samples) by flow cytometry (FACSVerse, BD Biosciences). All requirements imposed for polychromatic flow cytometry EV analysis were considered<sup>16</sup>. The trigger threshold was placed on the channel in which the dye used to stain EVs emits (lipophilic cationic dye, allophycocyanin—APC—channel, threshold value = 200/262.144). For all used parameters the height (H) signals and bi-exponential or logarithmic modes were selected. Instrument performances, data reproducibility, and fluorescence calibrations were sustained by the Cytometer Setup & Tracking Module (BD Biosciences). The evaluation of non-specific fluorescence was obtained by acquiring fluorescence minus one control combined with the respective isotype control. Compensation was automatically calculated. Data were analyzed using FACSuite v 1.0.6.5230 (BD Biosciences) and Flow Jo X v 10.0.7 (BD Biosciences) software. EV concentrations were obtained by the volumetric count function<sup>17</sup>. EVs were identified and subtyped as already reported.<sup>15</sup> Briefly, within the gate of intact EVs (LCD+/Phalloidin-), platelets derived EVs were identified as CD41a<sup>+</sup> events. Each of the above-mentioned EV subsets were also analyzed for the surface expression of phosphatidylserine (AnV<sup>+</sup>).

#### *In vitro HepG2 cells treatment*

Human HepG2 hepatocarcinoma cells were grown as previously reported<sup>18</sup> in DMEM high glucose, pyruvate (GIBCO, Thermo Fisher Scientific), 10% heat-inactivated fetal bovine serum (FBS; GIBCO, Thermo Fisher Scientific), 10,000 U ml<sup>-1</sup> penicillin G and 10 mg ml<sup>-1</sup> streptomycin sulphate. For *in vitro* assay, the HepG2 cells were transferred to 12-well plates (10<sup>6</sup> per well), allowed to adhere for 24 hours,



and treated with a commercially available recombinant human GPIIb/IIIa peptide (rGC, 4067-GP R&D Systems) at the indicated concentration for 1 hour and for 24 hours at 37°C. DMSO was used as control. After the incubation period, the HepG2 cells were lysed in order to harvest the mRNA (after 1 hours) and culture supernatants (after 24 hours) were collected for TPO assay as described above. The rGC protein (His 17-Leu 505) was expressed in mouse myeloma cells (90-120 kDa apparent molecular weight under SDS-PAGE).

## **Online Supplementary Results**

### *Clinical characteristics*

All subjects with T2DM were at high (n=64) or very high (n=36) CV risk, according to the 2019 ESC guidelines.<sup>19</sup> Among those without T2DM, 53 patients had very-high CV risk, 28 high risk, 18 moderate and 1 low risk. Patients without T2DM in primary prevention (n=78) had an average 10-year risk of fatal CVD of 12.3% according to European SCORE.<sup>20</sup>

Demographic, anthropometric, and clinical parameters of two groups of patients with vs. without diabetes were fairly balanced, except for higher BMI (p=0.026), HOMA-IR (p=0.038), higher prevalence of non-alcoholic-fatty-liver disease (NAFLD) (p<0.001) and retinopathy (p=0.007), lower total cholesterol (p=0.003) levels (with higher prevalence of statin treatment, p=0.015), lower total bilirubin (p=0.006), red blood cell count (p<0.001), hemoglobin (p<0.001), and hematocrit (p<0.001) in T2DM patients (Online Supplementary Table S1).

As expected, patients were significantly different for diabetes-specific treatment such as metformin (p<0.001), glinides (p=0.001), PPAR- $\gamma$  agonists (p<0.001), insulin (p=0.029), for glycated hemoglobin % (p<0.001), and fasting plasma glucose (p<0.001). Notably, median HbA1c in T2DM patients was 51.0 mmol/mol (6.8%), reflecting good glycemic control in T2DM patients in the group of patients with diabetes (Online Supplementary Table S1).

T2DM patients of the third tertile had higher platelet counts (p=0.080 across the three groups, p=0.047 third vs. first tertile), a higher prevalence of NAFLD (p=0.04) and a nonsignificant trend for higher HOMA-IR (p=0.071) third vs. first tertile (Table 1).

Among patients without T2DM, while platelet count (p=ns) did not change across sTXB<sub>2</sub> recovery slope tertiles, MPV (p=0.029) was lower in patients of third vs. first tertile. Moreover, patients in the upper tertile had a lower prevalence of dyslipidemia (p=0.017) and lower rate of statin treatment (p=0.014) vs. first tertile (Table 1 and Online Supplementary Table S2).

sTXB<sub>2</sub> recovery slope was inversely related to age and directly related to BMI, waist circumference, estimated glomerular filtration rate (eGFR) in T2DM patients (Online Supplementary

TableS7). Among patients without T2DM, the sTXB<sub>2</sub> recovery slope was directly related to weight, waist circumference, WHR and diastolic arterial pressure (Online Supplementary TableS7).

#### *Inhibited apoptosis in patients of the third tertile*

We found no differences in annexin-V-positive, both total and platelet-derived, extracellular vesicles, in patients of first (n=35) vs. third (n=21) tertile (Online Supplementary Figure S5A), to corroborate that the faster recovery of COX-1 and differential PS exposure is not linked to different pro-coagulant properties of third tertile platelets.

In the intrinsic apoptotic pathway of PLTs, the activation of the effector caspases (Caspase-3/7) determines the subsequent exposure of PS on the membrane.<sup>21-23</sup> We observed lower levels of caspase 3 in patients of third vs. first tertile (p=0.042, Online Supplementary Figure S5B) and vs. healthy subjects (p=0.015, Online Supplementary Figure S5B), supporting inhibition of apoptosis in our patients with accelerated platelet COX-1 recovery.

Based on data showing “inhibition of apoptosis” and enhanced GPIIb/IIIa receptor levels in poor aspirin responder, we investigated whether the different recovery of COX-1 activity reflected differences in 14-3-3 $\zeta$  platelet immunoprecipitates of complexes 14-3-3 $\zeta$ -GPIIb/IIIa and 14-3-3 $\zeta$ -COX-1 in patients of first (n=3) vs. third tertile (n=3) (Online Supplementary Figure S5C). We observed significantly lower levels of 14-3-3 $\zeta$ :GPIIb/IIIa complexes (p=0.016, Online Supplementary Figure S5C) and higher levels of 14-3-3 $\zeta$ :COX-1 complexes (p=0.019, Online Supplementary Figure S5C) in patients of third vs. first tertile, thus confirming inactivated apoptosis in patients of third tertile and providing a mechanistic link between COX-1 acetylation or inhibition and GPIIb/IIIa clustering.

## Online Supplementary References

1. American Diabetes Association. Diagnosis and classification of diabetes mellitus. *American Diabetes Association. Diabetes Care* 2013;36(Suppl. 1):S67–S74.
2. Ferraioli G, Monteiro LBS. Ultrasound-based techniques for the diagnosis of liver steatosis. *World Journal of Gastroenterology* 2019;25(40):6053-6062.
3. Patrono C, Ciabattini G, Pinca E, et al. Low dose aspirin and inhibition of thromboxane B2 production in healthy subjects. *Thrombosis Research* 1980;17(3–4):317–327.
4. Pradelles P, Grassi J, Maclouf J. Enzyme Immunoassays of Eicosanoids Using Acetylcholine Esterase as Label: An Alternative to Radioimmunoassay. *Analytical Chemistry* 1985;57(7):1170–1173.
5. Steinberg MH, Kelton JG, Collier BS. Plasma glycoalbumin. An aid in the classification of thrombocytopenic disorders. *N Engl J Med* 1987;317(17):1037–1042.
6. Josefsson EC, James C, Henley KJ, et al. Megakaryocytes possess a functional intrinsic apoptosis pathway that must be restrained to survive and produce platelets. *Journal of Experimental Medicine* 2011;208(10):2017–2031.
7. Barsam SJ, Psaila B, Forestier M, et al. Platelet production and platelet destruction: Assessing mechanisms of treatment effect in immune thrombocytopenia. *Blood* 2011;117(21):5723–5732.
8. Pieragostino D, Lanuti P, Cicalini I, et al. Proteomics characterization of extracellular vesicles sorted by flow cytometry reveals a disease-specific molecular cross-talk from cerebrospinal fluid and tears in multiple sclerosis. *Journal of Proteomics* 2019;204103403.
9. Madonna R, Pieragostino D, Cufaro MC, et al. Ponatinib Induces Vascular Toxicity through the Notch-1 Signaling Pathway. *Journal of Clinical Medicine* 2020;9(3):820.
10. Tyanova S, Temu T, Sinitcyn P, et al. The Perseus computational platform for comprehensive analysis of (prote)omics data. *Nature Methods* 2016;13(9):731–740.
11. Krämer A, Green J, Pollard J, Tugendreich S. Causal analysis approaches in ingenuity pathway analysis. *Bioinformatics* 2014;30(4):523–530.
12. Balduini A, Malara A, Pecci A, et al. Proplatelet formation in heterozygous Bernard-Soulier syndrome type Bolzano. *Journal of Thrombosis and Haemostasis* 2009;7(3):478–484.
13. Liu ZJ, Italiano J, Ferrer-Marin F, et al. Developmental differences in megakaryocytopoiesis are associated with up-regulated TPO signaling through mTOR and elevated GATA-1 levels in neonatal megakaryocytes. *Blood* 2011;117(15):4106–4117.
14. Buduo CAD, Giannini S, Abbonante V, Rosti V, Hoffmeister K, Balduini A. Increased  $\beta$ 4GALTI1 expression associates with platelet surface galactosylation and thrombopoietin plasma levels in MPNs. *Blood* 2021;137(15):2085-2089.
15. Marchisio M, Simeone P, Bologna G, et al. Flow cytometry analysis of circulating extracellular vesicle subtypes from fresh peripheral blood samples. *International Journal of Molecular Sciences* 2021;22(1):1–18.
16. Welsh JA, Van Der Pol E, Arkesteijn GJA, et al. MIFlowCyt-EV: a framework for standardized reporting of extracellular vesicle flow cytometry experiments. *J Extracell Vesicles* 2020;9(1):1713526.
17. Brocco D, Lanuti P, Simeone P, et al. Corrigendum to “Circulating Cancer Stem Cell-Derived Extracellular Vesicles as a Novel Biomarker for Clinical Outcome Evaluation.” *Journal of Oncology* 2020;20208947367.
18. Grozovsky R, Begonja AJ, Liu K, et al. The Ashwell-Morell receptor regulates hepatic thrombopoietin production via JAK2-STAT3 signaling. *Nature Medicine* 2015;21(1):47–54.
19. Cosentino F, Grant PJ, Aboyans V, et al. 2019 ESC Guidelines on diabetes, pre-diabetes, and cardiovascular diseases developed in collaboration with the EASD. *European Heart Journal* 2020;41(2):255–323.
20. Conroy RM, Pyörälä K, Fitzgerald AP, et al. Estimation of ten-year risk of fatal cardiovascular disease in Europe: The SCORE project. *European Heart Journal* 2003;24(11):987–1003.
21. Josefsson EC, Vainchenker W, James C. Regulation of Platelet Production and Life Span: Role of Bcl-xL and Potential Implications for Human Platelet Diseases. *IJMS* 2020;21(20):7591.
22. Lebois M, Josefsson EC. Regulation of platelet lifespan by apoptosis. *Platelets* 2016;27(6):497–504.
23. Jackson SP, Schoenwaelder SM. Procoagulant platelets: are they necrotic? *Blood* 2010;116(12):2011–2018.

## Online Supplementary Figure S1

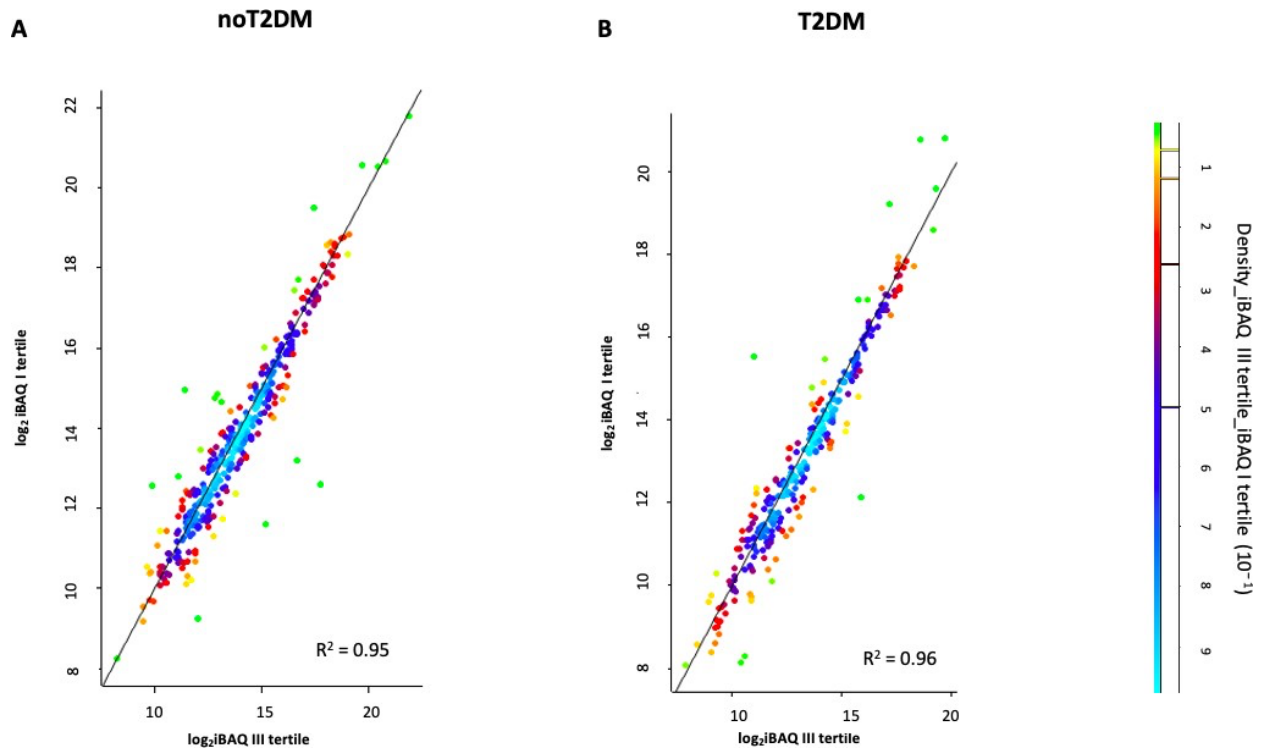

**Online Supplementary Figure S1: Density Plot of protein expression in patients without T2DM (A) and with T2DM (B).** Protein expression is reported as density value of iBAQ: data points with the highest density are light blue, on the contrary data points with lowest density are bright green. The color gradient is report in the legend made on comparison between third vs. first tertile both in patients without and with T2DM.

## Online Supplementary Figure S2

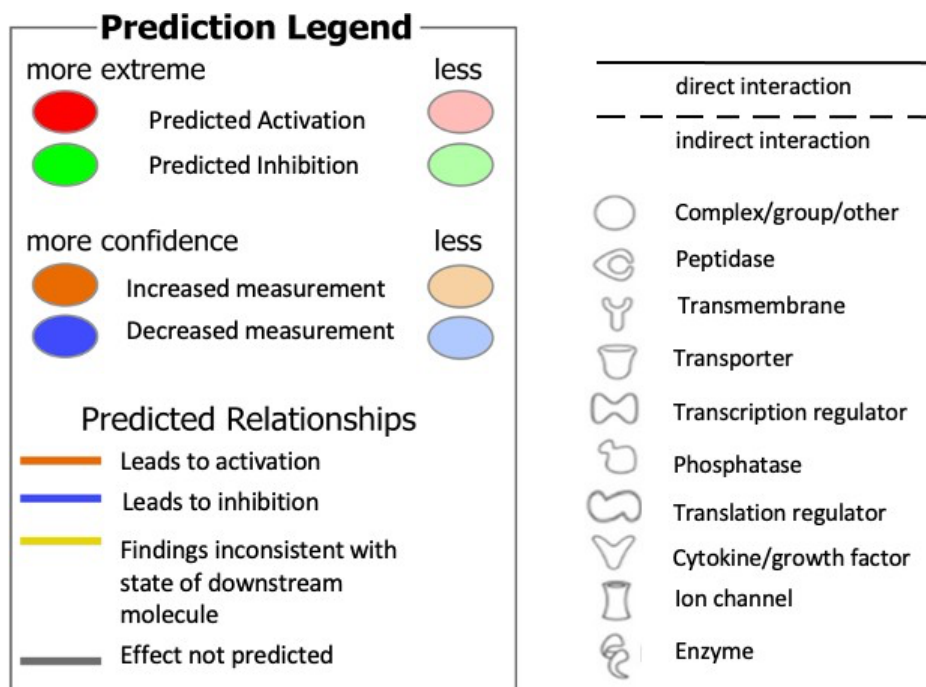

**Online Supplementary Figure S2: IPA networks legend.** The figure shows the color and shape key to read the IPA networks reported in the work. Red and green color: increased or decreased measurements of quantified proteins. Blue and orange shapes: predicted inhibition (z-scores  $\leq -2.0$ ) and activation (z-scores  $\geq 2.0$ ). Direct activation: orange solid lines; direct inhibition: blue solid lines. Indirect relationships: dotted lines. Yellow and grey lines: “inconsistent” or “not predicted” relationship effects.

### Online Supplementary Figure S3

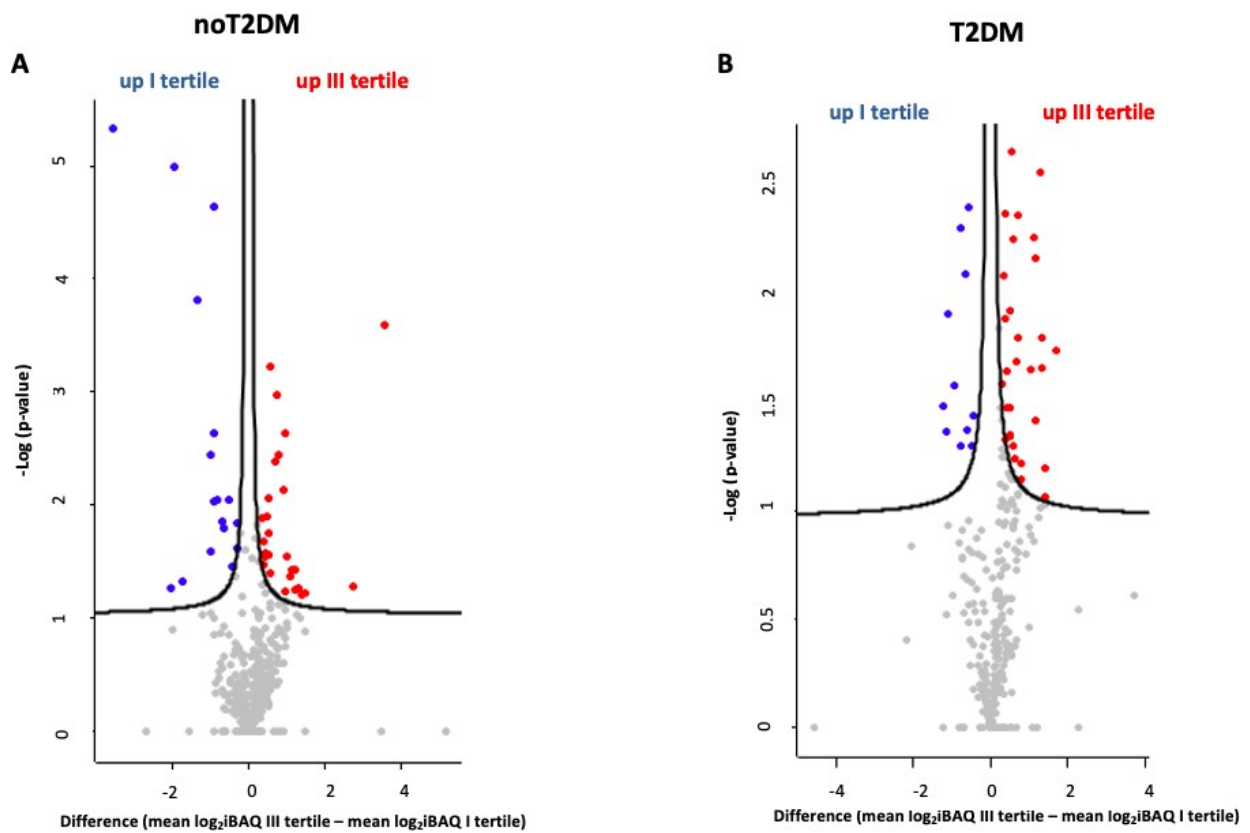

**Online Supplementary Figure S3: Volcano Plots of differentially expressed proteins in the different clinical groups, in patients without and with T2DM (A and B, respectively).** Proteins were graphed by fold change (Difference) and  $-\text{Log}(p\text{-value})$  using a false discovery rate (FDR) of 0.22 and an  $S_0$  of 0.05 for both graphs. Grey dots represent proteins that are not differentially expressed; while red and blue dots represent proteins that are significantly up-regulated in the pooled platelets of third tertile and up-regulated in the pooled platelets of first tertile, respectively, in both the clinical conditions.

## Online Supplementary Figure S4

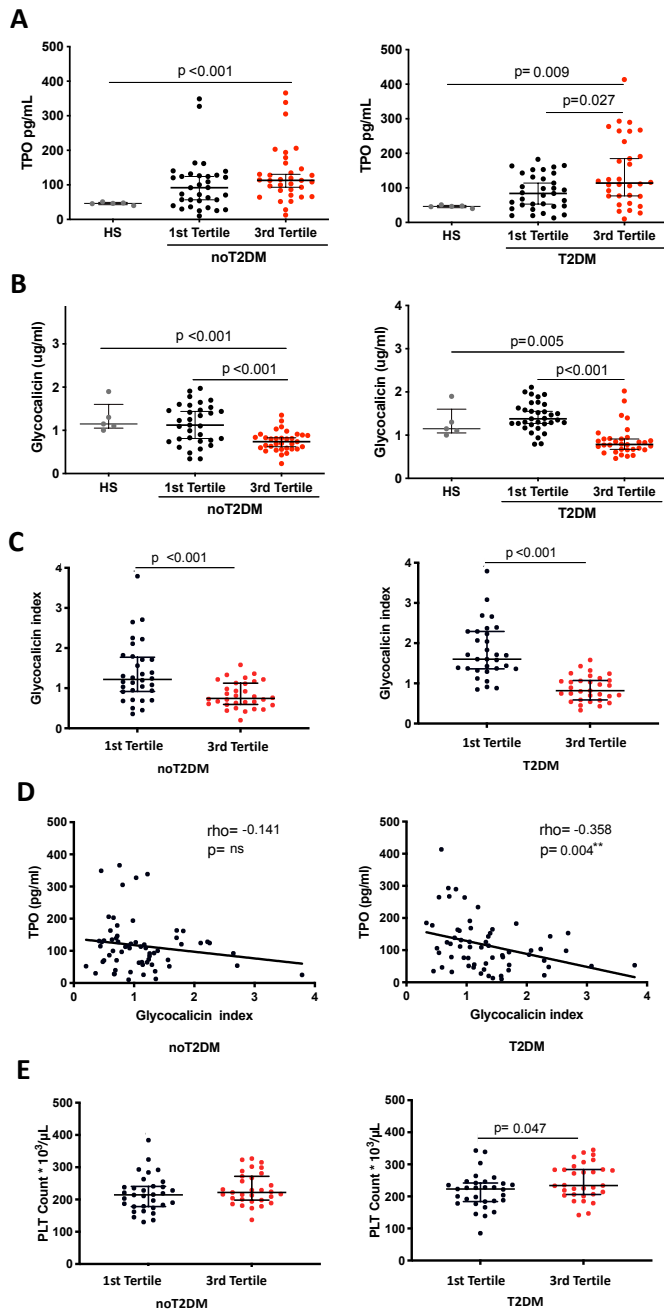

**Online Supplementary Figure S4: Higher circulating levels of thrombopoietin (TPO) and platelet (PLT) count and lower glycoalcin (GC) and glycoalcin index (GCI) at 24h after witnessed aspirin intake in patients with faster COX-1 recovery.** Comparison of TPO (A), GC (B), GCI (C) and PLT count (E) between first and third sTXB<sub>2</sub> slope tertile in patients without (n=66) and with T2DM (n=66). Comparison of TPO (A) and GC (B) in third vs. first sTXB<sub>2</sub> slope tertile and vs. healthy subjects (HS, n=5) in patients without (n=66) and with T2DM (n=66). Significance was calculated by Mann-Whitney *U* test. Correlation between GCI and TPO in patients without and with T2DM (D). Spearman correlation coefficient and p-value are reported.



Online Supplementary Figure S5

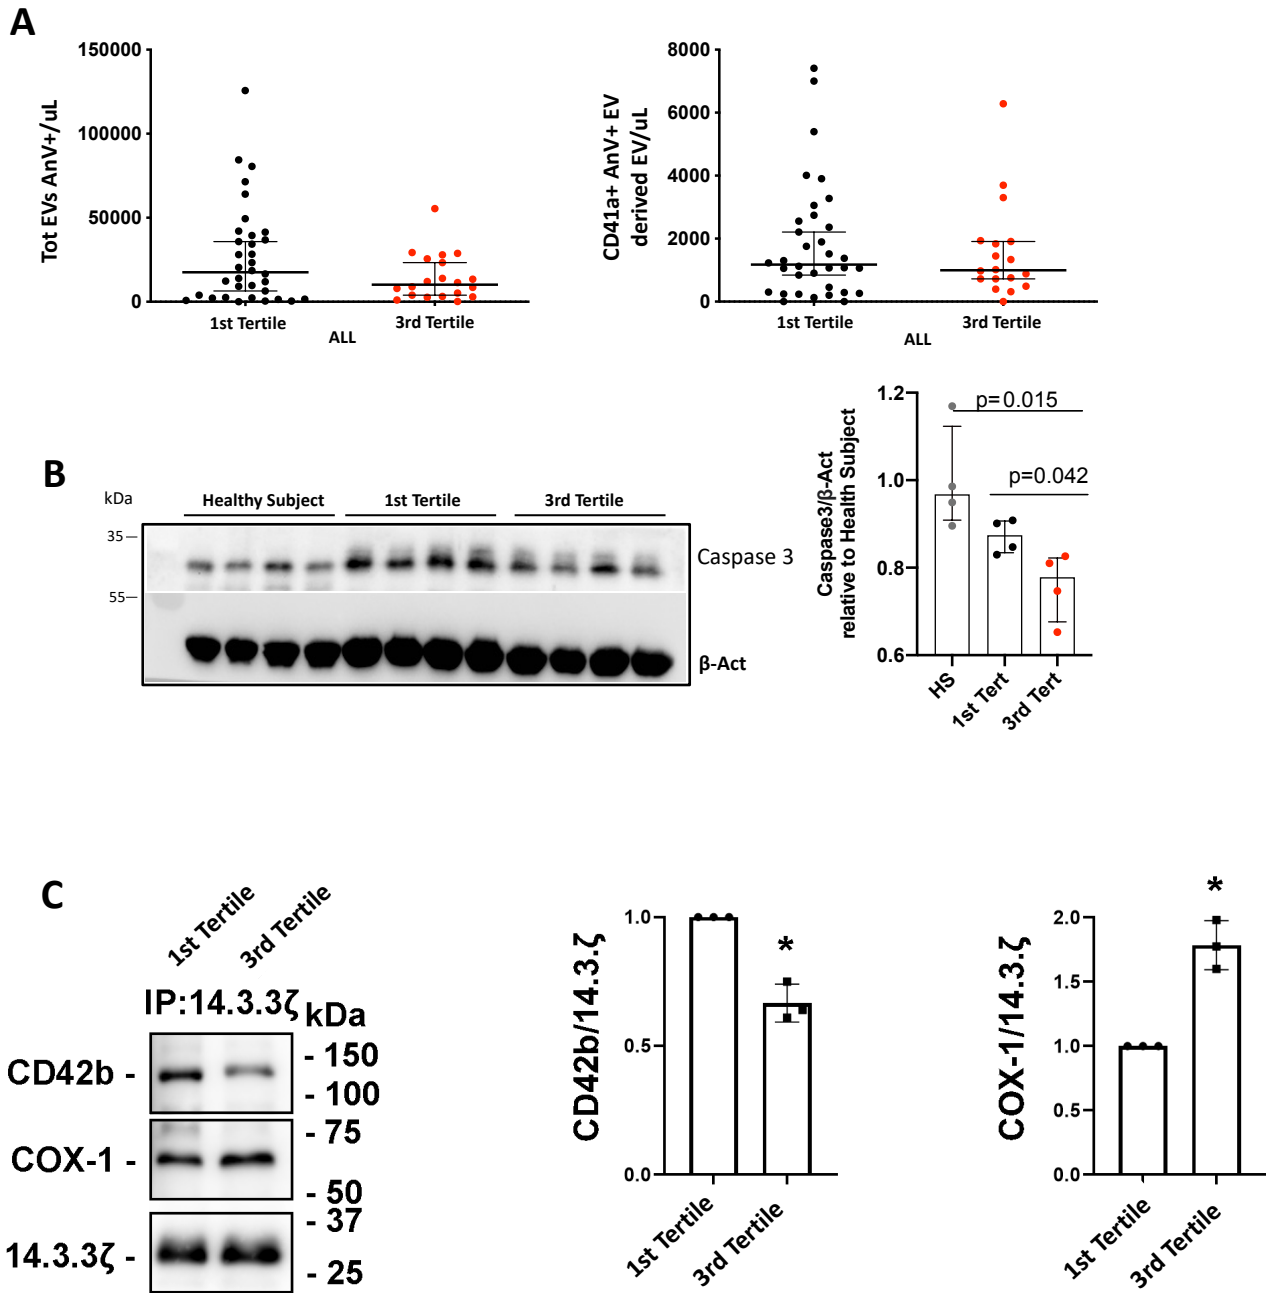

**Online Supplementary Figure S5: Inhibited apoptosis in patients of the third tertile.** The number of AnnexinV-positive extracellular vesicles (Total EVs AnV+ and, CD41a+ PLT AnV+ derived) was measured in patients of first (n=35) and third tertile (n=21) (A); Expression levels of caspase 3 in healthy subjects (n=4), patients of first (n=4) and third tertile (n=4).  $\beta$ -Actin was used as loading control (B); Measurement in 14-3-3 $\zeta$  platelet immunoprecipitates of complexes 14-3-3 $\zeta$ -COX-1 and 14-3-3 $\zeta$ -GPIIb/IIIa in patients of first (n=3) and third tertile (n=3) (C). Significance was calculated by Mann-Whitney *U* test or by Student's *t*-test.

**Online Supplementary Table S1. Characteristics of patients with and without type 2 diabetes mellitus (T2DM)**

| Variable                                   | noT2DM              | T2DM                | P value* |
|--------------------------------------------|---------------------|---------------------|----------|
| N.                                         | 100                 | 100                 | 1.000    |
| Age – years                                | 69.0 (63.0-74.0)    | 68.0 (64.0-72.8)    | 0.989    |
| Male gender, n.                            | 57                  | 64                  | 0.386    |
| Smoke, n.                                  | 10                  | 13                  | 0.658    |
| Weight – Kg                                | 77.0 (67.0-85.8)    | 80.0 (72.4-91.8)    | 0.084    |
| BMI - Kg/m <sup>2</sup>                    | 27.9 (25.2-31.1)    | 29.9 (25.8-33.0)    | 0.026    |
| Waist circumference – cm                   | 100.0 (92.3-110.0)  | 104.0 (96.0- 111.0) | 0.069    |
| WHR                                        | 1.0 (0.9-1.0)       | 1.0 (0.9-1.0)       | 0.290    |
| Obesity, n.                                | 40                  | 49                  | 0.255    |
| Systolic arterial pressure – mmHg          | 140.0 (128.3-153.8) | 146.0 (134.3-152.0) | 0.120    |
| Diastolic arterial pressure – mmHg         | 77.0 (70.0-83.0)    | 75.0 (70.0-80.0)    | 0.626    |
| Hypertension, n.                           | 80                  | 90                  | 0.073    |
| Glycated hemoglobin - mmol/mol             | 38.8 (35.5-42.1)    | 50.8 (45.4-58.5)    | 0.000    |
| - %                                        | 5.7 (5.4-6.0)       | 6.8 (6.3-7.5)       |          |
| Diabetes duration – years                  | -                   | 5.0 (2.0-10.0)      | -        |
| Total cholesterol – mmol/L                 | 4.9 (4.1-5.5)       | 4.4 (3.8-5.0)       | 0.003    |
| HDL cholesterol – mmol/L                   | 1.3 (1.1-1.5)       | 1.3 (1.0-1.5)       | 0.160    |
| Triglycerides – mmol/L                     | 1.3 (0.9-1.7)       | 1.4 (1.0-1.9)       | 0.198    |
| Dyslipidemia, n                            | 54                  | 60                  | 0.475    |
| AST - U/L                                  | 24.0 (21.0-28.0)    | 24.0 (20.0-31.0)    | 0.851    |
| ALT - U/L                                  | 28.5 (24.0-33.0)    | 31.0 (25.0-40.8)    | 0.076    |
| Total Bilirubin – umol/L                   | 12 (10-15)          | 10 (9-14)           | 0.006    |
| NAFLD, n.                                  | 52                  | 76                  | 0.000    |
| hs-C-reactive protein – nmol/L             | 19.0 (9.5-38.1)     | 19.0 (9.5-47.6)     | 0.619    |
| Red Blood Cell count, x10 <sup>12</sup> /L | 4.9 (4.5-5.1)       | 4.6 (4.4- 4.9)      | 0.000    |
| Hemoglobin – g/dL                          | 14.3 (13.5-15.3)    | 13.7 (12.8-14.4)    | 0.000    |
| Hematocrit – %                             | 42.6 (40.0-45.1)    | 38.3 (40.1-42.4)    | 0.000    |
| Red cell Distribution Width –              | 13.2 (12.8-13.8)    | 12.8 (13.3- 13.9)   | 0.491    |

|                                              |                     |                     |       |
|----------------------------------------------|---------------------|---------------------|-------|
| %                                            |                     |                     |       |
| Platelet count – '10 <sup>9</sup> /L         | 223.5 (189.3-266.0) | 227.0 (191.0-264.3) | 0.963 |
| Platelet Distribution Width – fL             | 13.7 (12.3-15.0)    | 13.8 (12.4-15.4)    | 0.538 |
| Mean Platelet Volume – fL                    | 11.2 (10.5-11.7)    | 11.3 (10.6-11.9)    | 0.500 |
| White Blood Cell count – '10 <sup>9</sup> /L | 6.6 (5.6-7.8)       | 7.0 (5.8-8.3)       | 0.130 |
| Fasting plasma glucose – mmol/L              | 5.29 (4.89-5.67)    | 6.75 (5.79-7.61)    | 0.000 |
| Fasting plasma Insulin – pmol/L              | 67.4 (54.2-95.8)    | 72.9 (51.4-102.7)   | 0.784 |
| HOMA-IR                                      | 2.4 (1.7-3.2)       | 3.2 (1.9-5.0)       | 0.038 |
| Serum Creatinine – umol/L                    | 70.4 (61.6-88.0)    | 70.4 (61.6-79.2)    | 0.221 |
| eGFR – ml/min                                | 88.0 (72.5-99.6)    | 88.8 (78.0-98.6)    | 0.222 |
| Uric Acid – umol/L                           | 327.1 (267.7-410.4) | 333.1 (273.6-386.6) | 0.990 |
| Aspirin treatment duration - years           | 4.0 (2.0-8.0)       | 5.0 (2.0-10.0)      | 0.190 |
| <b>Cardiovascular disease, n.</b>            |                     |                     |       |
| Stable CAD                                   | 6                   | 11                  | 0.311 |
| Carotid stenosis (>50%), n.                  | 30                  | 42                  | 0.105 |
| MI or revascularization                      | 11                  | 16                  | 0.308 |
| Stroke, TIA or revascularization             | 11                  | 9                   | 0.814 |
| Peripheral artery disease                    | 1                   | 6                   | 0.118 |
| <b>Diabetic microvascular disease, n.</b>    |                     |                     |       |
| Retinopathy                                  | 0                   | 8                   | 0.007 |
| Nephropathy                                  | 0                   | 2                   | 0.497 |
| Neuropathy                                   | 0                   | 1                   | 1.000 |
| <b>Therapy, n.</b>                           |                     |                     |       |
| Metformin                                    | 1                   | 63                  | 0.000 |
| Glinide                                      | 0                   | 11                  | 0.001 |
| PPAR-γ agonists                              | 0                   | 12                  | 0.000 |
| Sulfonylurea                                 | 0                   | 4                   | 0.121 |
| Insulin                                      | 0                   | 6                   | 0.029 |

|                         |     |     |       |
|-------------------------|-----|-----|-------|
| sGLT2 inhibitors        | 0   | 3   | 0.246 |
| GLP-1 RA                | 0   | 2   | 0.497 |
| DPP-IV                  | 0   | 5   | 0.059 |
| Acarbose                | 0   | 2   | 0.497 |
| ACE-I                   | 27  | 31  | 0.640 |
| ARBs                    | 34  | 41  | 0.381 |
| Diuretics               | 28  | 31  | 0.757 |
| β-blockers              | 34  | 32  | 0.881 |
| CCA                     | 22  | 26  | 0.602 |
| Other antihypertensives | 3   | 9   | 0.134 |
| Statins                 | 36  | 54  | 0.015 |
| Fibrates                | 1   | 2   | 1.000 |
| Ezetimibe               | 8   | 8   | 1.000 |
| Omega 3                 | 4   | 3   | 1.000 |
| Proton Pump Inhibitors  | 45  | 39  | 0.474 |
| ASA                     | 100 | 100 | 1.000 |

*Abbreviations:* BMI= body mass index, WHR= Waist to Hip ratio, HDL= high-density lipoproteins, AST= Aspartate Aminotransferase, ALT= Alanine amino Transferase, NAFLD= non alcoholic fatty liver disease, HOMA-IR= Homeostatic Model Assessment of Insulin Resistance, eGFR= estimated glomerular filtration rate, CAD= coronary artery disease, CCA= Common carotid artery, MI= myocardial infarction, TIA= transient ischemic attack, PPAR-Y= peroxisome proliferator-activated receptor gamma, SGLT2= Sodium-glucose co-transporter-2, GLP1 RA= glucagon-like peptide 1 receptor agonist, DPP-IV= dipeptidyl peptidase IV, ACE-I= angiotensin-converting-enzyme -inhibitors, ARBs= angiotensin receptor blockers, CCA= calcium channel antagonists, ASA= acetylsalicylic acid.

Data are median (25th – 75th percentile). †Determined by Kruskal-Wallis or Mann-Whitney or Chi Square test, as appropriate.

**Online Supplementary Table S2.** Characteristics of patients with and without type 2 diabetes in relation to tertiles of sTXB<sub>2</sub> recovery slope

| Variable                                      | T2DM                    |                         |                         |         | noT2DM                  |                         |                         |         |
|-----------------------------------------------|-------------------------|-------------------------|-------------------------|---------|-------------------------|-------------------------|-------------------------|---------|
|                                               | 1 <sup>st</sup> tertile | 2 <sup>nd</sup> tertile | 3 <sup>rd</sup> tertile | P value | 1 <sup>st</sup> tertile | 2 <sup>nd</sup> tertile | 3 <sup>rd</sup> tertile | P value |
| <b>Cardiovascular disease, n. (%)</b>         |                         |                         |                         |         |                         |                         |                         |         |
| Carotid stenosis (>50%)                       | 12 (36.4)               | 15 (44.1)               | 15 (45.5)               | 0.721   | 10 (30.3)               | 0 (0.0)                 | 11 (33.3)               | 0.828   |
| MI or revascularization                       | 6 (18.2)                | 3 (8.8)                 | 7 (21.2)                | 0.329   | 8 (24.2)                | 9 (26.5)                | 2 (6.1)                 | 0.011   |
| Stroke, TIA or revascularization              | 4 (12.1)                | 1 (2.9)                 | 4 (12.1)                | 0.315   | 1 (3.0)                 | 3 (8.8)                 | 7 (21.2)                | 0.054   |
| Peripheral artery disease                     | 3 (9.1)                 | 2 (5.9)                 | 1 (3.0)                 | 0.584   | 0 (0.0)                 | 0 (0.0)                 | 1 (3.0)                 | 0.359   |
| <b>Diabetic microvascular disease, n. (%)</b> |                         |                         |                         |         |                         |                         |                         |         |
| Retinopathy                                   | 3 (9.1)                 | 1 (2.9)                 | 4 (12.1)                | 0.368   | -                       | -                       | -                       | -       |
| Nephropathy                                   | 0 (0.0)                 | 0 (0.0)                 | 2 (6.1)                 | 0.126   | -                       | -                       | -                       | -       |
| Neuropathy                                    | 0 (0.0)                 | 0 (0.0)                 | 1 (3.0)                 | 0.359   | -                       | -                       | -                       | -       |
| <b>Therapy, n. (%)</b>                        |                         |                         |                         |         |                         |                         |                         |         |
| Metformin                                     | 21 (63.6)               | 21 (61.8)               | 21 (63.6)               | 0.983   | -                       | -                       | -                       | -       |
| Glinide                                       | 4 (12.1)                | 3 (8.8)                 | 4 (12.1)                | 0.883   | -                       | -                       | -                       | -       |
| PPAR- $\gamma$ agonists                       | 4 (12.1)                | 4 (11.8)                | 4 (12.1)                | 0.999   | -                       | -                       | -                       | -       |
| Sulfonylurea                                  | 2 (6.1)                 | 0 (0.0)                 | 2 (6.1)                 | 0.342   | -                       | -                       | -                       | -       |
| Insulin                                       | 1 (3.0)                 | 2 (5.9)                 | 3 (9.1)                 | 0.584   | -                       | -                       | -                       | -       |
| sGLT2 inhibitors                              | 0 (0.0)                 | 1 (2.9)                 | 2 (6.1)                 | 0.353   | -                       | -                       | -                       | -       |
| GLP-1 RA                                      | 0 (0.0)                 | 1 (2.9)                 | 1 (3.0)                 | 0.605   | -                       | -                       | -                       | -       |
| DPP-IV                                        | 2 (6.1)                 | 1 (2.9)                 | 2 (6.1)                 | 0.795   | -                       | -                       | -                       | -       |
| Acarbose                                      | 0 (0.0)                 | 2 (5.9)                 | 0 (0.0)                 | 0.138   | -                       | -                       | -                       | -       |
| ACE-I                                         | 8 (24.2)                | 9 (26.5)                | 14 (42.4)               | 0.218   | 6 (18.2)                | 12 (35.3)               | 9 (27.3)                | 0.288   |
| ARBs                                          | 12 (36.4)               | 16 (47.1)               | 13 (39.4)               | 0.656   | 11 (33.3)               | 9 (26.5)                | 14 (42.4)               | 0.385   |
| Diuretics                                     | 8 (24.2)                | 11 (32.4)               | 12 (36.4)               | 0.555   | 10 (30.3)               | 12 (35.3)               | 6 (18.2)                | 0.278   |
| $\beta$ -blockers                             | 12 (36.4)               | 11 (32.4)               | 9 (27.3)                | 0.730   | 12 (36.4)               | 12 (35.3)               | 10 (30.3)               | 0.857   |
| CCA                                           | 9 (27.3)                | 8 (23.5)                | 9 (27.3)                | 0.922   | 7 (21.2)                | 8 (23.5)                | 7 (21.2)                | 0.965   |
| Other antihypertensives                       | 2 (6.1)                 | 4 (11.8)                | 3 (9.1)                 | 0.717   | 0 (0.0)                 | 2 (5.9)                 | 1 (3.0)                 | 0.369   |
| Statins                                       | 16 (48.5)               | 20 (58.8)               | 18 (54.4)               | 0.695   | 17 (51.5)               | 6 (17.6)                | 13 (39.4)               | 0.014   |
| Fibrates                                      | 0 (0.0)                 | 2 (5.9)                 | 0 (0.0)                 | 0.138   | 0 (0.0)                 | 0 (0.0)                 | 1 (3.0)                 | 0.359   |
| Ezetimibe                                     | 4 (12.1)                | 2 (5.9)                 | 2 (6.1)                 | 0.566   | 6 (18.2)                | 1 (2.9)                 | 1 (3.0)                 | 0.031   |
| Omega 3                                       | 1 (3.0)                 | 2 (5.9)                 | 0 (0.0)                 | 0.373   | 3 (9.1)                 | 1 (2.9)                 | 0 (0.0)                 | 0.157   |
| Proton Pump Inhibitors                        | 12 (36.4)               | 16 (47.1)               | 11 (33.3)               | 0.480   | 16 (48.5)               | 15 (44.1)               | 14 (42.4)               | 0.878   |
| ASA                                           | 33 (100.0)              | 34 (100.0)              | 33 (100.0)              | -       | 33 (100.0)              | 34 (100.0)              | 33 (100.0)              | -       |
| Aspirin treatment duration – year             | 5.0 (2.0-10.0)          | 4.0 (2.0-10.0)          | 5.0 (2.0-9.5)           | 0.579   | 4.0 (1.5-10.0)          | 3.0 (1.0-7.3)           | 5.0 (2.0-9.0)           | 0.464   |

Abbreviations: CAD= coronary artery disease, CCA= Common carotid artery, MI= myocardial infarction, TIA= transient ischemic attack, PPAR- $\gamma$ = peroxisome proliferator-activated receptor gamma, SGLT2= Sodium-glucose co-transporter-2, GLP1 RA= glucagon-like peptide 1 receptor agonist, DPP-IV= dipeptidyl peptidase IV, ACE-I= angiotensin-converting-enzyme - inhibitors, ARBs= angiotensin receptor blockers, CCA= calcium channel antagonists, ASA= acetylsalicylic acid. Data are median (25th – 75th percentile).

<sup>†</sup>Determined by Kruskal-Wallis or  $\chi^2$  test, as appropriate.

**Online Supplementary Table S3. List of flow cytometry specificities and reagents.**

| <b>Detection</b>              | <b>Fluorochrome</b> | <b>Vendor</b>  | <b>Ab Clone</b> | <b>Catalog</b> | <b>Amount per Test</b> |
|-------------------------------|---------------------|----------------|-----------------|----------------|------------------------|
| Lipophilic Cationic Dye (LCD) | -                   | BD Biosciences | -               | 626267 custom  | 0.5                    |
| Phalloidin-FITC               | FITC                | BD Biosciences | -               | 626267 custom  | 0.5                    |
| CD41a                         | PE                  | BD Biosciences | HIP8            | 555467         | 2,5 µl                 |
| AnnexV                        | PerCP-Cy5.5         | BD Biosciences |                 | 561431         | 0.25 µl                |

**Keys:** Peridinin-Chlorophyll-protein-Cyanine 5.5 (PerCP-Cy5.5). Becton Dickison (BD) Bioscience (San Jose, CA, USA)

**Online Supplementary Table S4. Significantly differential proteins at univariate statistical analysis (Volcano Plot) in pooled patients without diabetes (noT2DM). A positive value of “Difference” indicates an up-regulation in third tertile respect to first tertile, while a negative value indicates a down-regulation in the same comparison.**

| Protein IDs                      | Protein names            | Gene names | -LOG(P-value) | Difference | Peptides | Score  | log2 iBAQ                       |
|----------------------------------|--------------------------|------------|---------------|------------|----------|--------|---------------------------------|---------------------------------|---------------------------------|---------------------------------|---------------------------------|---------------------------------|
|                                  |                          |            |               |            |          |        | 1 <sup>st</sup> tertile noT2DMC | 1 <sup>st</sup> tertile noT2DMC | 1 <sup>st</sup> tertile noT2DMC | 3 <sup>rd</sup> tertile noT2DMC | 3 <sup>rd</sup> tertile noT2DMC | 3 <sup>rd</sup> tertile noT2DMC |
|                                  |                          |            |               |            |          |        | 02                              | 03                              | 04                              | 02                              | 03                              | 04                              |
| Myosin light chain 1/3, skeletal |                          |            |               |            |          |        |                                 |                                 |                                 |                                 |                                 |                                 |
| P05976                           | muscle isoform           | MYL1       | 5.332177      | -3.54049   | 1        | 2.6151 | 14.95606                        | 15.01581                        | 14.9036                         | 0                               | 11.4417                         | 11.3943                         |
| P69905                           | Hemoglobin subunit alpha | HBA1       | 1.258716      | -2.03383   | 10       | 192.99 | 19.16416                        | 19.6849                         | 19.60449                        | 16.31771                        | 17.19017                        | 18.84417                        |
| P10124                           | Serglycin                | SRGN       | 5.001477      | -1.95195   | 2        | 24.377 | 14.80972                        | 14.86767                        | 14.88216                        | 12.88108                        | 0                               | 12.92139                        |
| Q9Y6C2                           | EMILIN-1                 | EMILIN1    | 1.325754      | -1.71139   | 13       | 25.248 | 12.65988                        | 13.05371                        | 12.66831                        | 11.8011                         | 9.91247                         | 11.53416                        |
| P04275                           | von Willebrand factor    | VWF        | 3.813111      | -1.31896   | 43       | 89.557 | 13.47193                        | 13.36782                        | 13.50643                        | 11.96391                        | 12.24487                        | 12.18053                        |
| P62328                           | Thymosin beta-4          | TMSB4X     | 2.448961      | -0.98798   | 5        | 21.013 | 17.6404                         | 17.49748                        | 17.97146                        | 16.63254                        | 16.87183                        | 16.64104                        |
| Glycogen phosphorylase, brain    |                          |            |               |            |          |        |                                 |                                 |                                 |                                 |                                 |                                 |
| P11216                           | form                     | PYGB       | 1.596722      | -0.9733    | 10       | 17.113 | 12.34452                        | 12.59038                        | 12.37278                        | 11.74239                        | 10.9257                         | 11.71969                        |
| Tyrosine-protein phosphatase     |                          |            |               |            |          |        |                                 |                                 |                                 |                                 |                                 |                                 |
| P29350                           | non-receptor type 6      | PTPN6      | 2.641331      | -0.90101   | 3        | 25.222 | 11.43327                        | 11.48553                        | 11.40243                        | 10.69427                        | 10.28575                        | 10.63816                        |
| P02042                           | Hemoglobin subunit delta | HBD        | 4.641929      | -0.8987    | 12       | 31.915 | 15.97123                        | 16.09809                        | 16.00904                        | 15.14534                        | 15.13495                        | 15.10198                        |
| Ras GTPase-activating-like       |                          |            |               |            |          |        |                                 |                                 |                                 |                                 |                                 |                                 |
| Q13576                           | protein IQGAP2           | IQGAP2     | 2.029018      | -0.89803   | 4        | 8.8637 | 10.49725                        | 10.50661                        | 10.62388                        | 9.438646                        | 9.477212                        | 10.01778                        |
| P68871                           | Hemoglobin subunit beta  | HBB        | 2.040805      | -0.8288    | 14       | 323.31 | 20.89386                        | 20.37571                        | 20.37103                        | 19.69129                        | 19.696                          | 19.76691                        |
| P12259                           | Coagulation factor V     | F5         | 1.848569      | -0.67294   | 17       | 39.206 | 12.35113                        | 12.71031                        | 12.17068                        | 11.67424                        | 11.75951                        | 11.77956                        |



|                                   |                                 |         |          |          |     |        |          |          |          |          |          |          |
|-----------------------------------|---------------------------------|---------|----------|----------|-----|--------|----------|----------|----------|----------|----------|----------|
| Sarcoplasmic/endoplasmic          |                                 |         |          |          |     |        |          |          |          |          |          |          |
| <b>Q93084</b>                     | reticulum calcium ATPase 3      | ATP2A3  | 1.796691 | -0.62606 | 21  | 145.32 | 14.84711 | 15.00325 | 15.33494 | 14.31465 | 14.49648 | 14.49598 |
| <b>P35579</b>                     | Myosin-9                        | MYH9    | 2.044834 | -0.52842 | 130 | 323.31 | 18.54762 | 18.53727 | 18.62724 | 18.15837 | 17.82706 | 18.14146 |
| <b>P02679</b>                     | Fibrinogen gamma chain          | FGG     | 1.457894 | -0.42144 | 20  | 323.31 | 18.73218 | 18.62607 | 18.52187 | 18.0146  | 18.17524 | 18.42595 |
| <b>P05106</b>                     | Integrin beta-3                 | ITGB3   | 1.846059 | -0.30173 | 29  | 323.31 | 17.77462 | 17.72521 | 17.6447  | 17.37653 | 17.32869 | 17.53412 |
| <b>Q7Z406</b>                     | Myosin-14                       | MYH14   | 1.613068 | -0.29379 | 11  | 3.7569 | 12.92928 | 0        | 12.99435 | 12.76754 | 12.63411 | 12.60242 |
| <b>P02656</b>                     | Apolipoprotein C-III            | APOC3   | 1.882155 | 0.352379 | 1   | 14.545 | 12.80306 | 12.70016 | 12.64908 | 12.95456 | 13.06056 | 13.19431 |
| <b>Q71U36</b>                     | Tubulin alpha-1A chain          | TUBA1A  | 1.674371 | 0.378992 | 17  | 3.33   | 12.98865 | 12.87233 | 12.77748 | 13.37041 | 13.30834 | 13.09668 |
| <b>P06753</b>                     | Tropomyosin alpha-3 chain       | TPM3    | 1.475808 | 0.384619 | 12  | 59.094 | 17.01944 | 17.19806 | 17.42431 | 17.65536 | 17.58461 | 17.5557  |
| <b>P06733</b>                     | Alpha-enolase                   | ENO1    | 1.57891  | 0.430053 | 16  | 228.3  | 16.76811 | 16.55817 | 16.38956 | 17.0268  | 16.88691 | 17.09228 |
| F-actin-capping protein subunit   |                                 |         |          |          |     |        |          |          |          |          |          |          |
| <b>P52907</b>                     | alpha-1                         | CAPZA1  | 1.546087 | 0.458621 | 6   | 33.976 | 14.11772 | 14.45725 | 14.1055  | 14.54352 | 14.78948 | 14.72334 |
| Glyceraldehyde-3-phosphate        |                                 |         |          |          |     |        |          |          |          |          |          |          |
| <b>P04406</b>                     | dehydrogenase                   | GAPDH   | 1.894752 | 0.490143 | 13  | 317.94 | 17.77514 | 17.63616 | 17.91992 | 18.33704 | 18.10835 | 18.35625 |
| <b>P61225</b>                     | Ras-related protein Rap-2b      | RAP2B   | 1.556436 | 0.523111 | 2   | 3.8337 | 0        | 11.65374 | 11.37488 | 12.03738 | 12.143   | 11.93188 |
| <b>P01876</b>                     | Ig alpha-1 chain C region       | IGHA1   | 1.751109 | 0.525279 | 4   | 12.817 | 13.47814 | 13.50569 | 13.88408 | 14.21371 | 14.12444 | 14.10558 |
| <b>P00491</b>                     | Purine nucleoside phosphorylase | PNP     | 2.055927 | 0.539813 | 6   | 28.786 | 13.73904 | 13.78187 | 13.80413 | 14.50265 | 14.3246  | 14.11724 |
| Actin-related protein 2/3 complex |                                 |         |          |          |     |        |          |          |          |          |          |          |
| <b>O15511</b>                     | subunit 5                       | ARPC5   | 1.394136 | 0.578421 | 4   | 14.082 | 14.54702 | 15.14669 | 14.88741 | 15.53992 | 15.5073  | 15.26916 |
| Chloride intracellular channel    |                                 |         |          |          |     |        |          |          |          |          |          |          |
| <b>O00299</b>                     | protein 1                       | CLIC1   | 3.224727 | 0.58839  | 10  | 79.555 | 16.41005 | 16.51297 | 16.32745 | 16.95651 | 17.04655 | 17.01258 |
| <b>P14625</b>                     | Endoplasmic                     | HSP90B1 | 2.384741 | 0.719527 | 22  | 120.9  | 13.91083 | 14.27801 | 14.2746  | 14.8825  | 14.872   | 14.86752 |
| Delta-aminolevulinic acid         |                                 |         |          |          |     |        |          |          |          |          |          |          |
| <b>P13716</b>                     | dehydratase                     | ALAD    | 2.98044  | 0.75905  | 2   | 6.0967 | 0        | 11.66787 | 11.67225 | 0        | 12.45358 | 12.40464 |

|               |                                  |        |          |          |    |        |          |          |          |          |          |          |
|---------------|----------------------------------|--------|----------|----------|----|--------|----------|----------|----------|----------|----------|----------|
| <b>P60174</b> | Triosephosphate isomerase        | TPI1   | 2.451393 | 0.806739 | 11 | 37.299 | 14.78872 | 14.59881 | 15.00233 | 15.71893 | 15.57344 | 15.5177  |
|               | Peptidyl-prolyl cis-trans        |        |          |          |    |        |          |          |          |          |          |          |
| <b>P23284</b> | isomerase B                      | PIIB   | 2.130531 | 0.895937 | 8  | 21.934 | 15.38903 | 14.9917  | 15.55408 | 16.12155 | 16.16938 | 16.33169 |
| <b>Q99832</b> | T-complex protein 1 subunit eta  | CCT7   | 1.242115 | 0.948009 | 5  | 7.8265 | 10.90516 | 0        | 10.95768 | 0        | 11.64372 | 12.11514 |
| <b>Q15084</b> | Protein disulfide-isomerase A6   | PDIA6  | 2.629273 | 0.951978 | 7  | 41.456 | 14.77427 | 14.43169 | 14.6775  | 15.39238 | 15.66828 | 15.67874 |
| <b>P11021</b> | 78 kDa glucose-regulated protein | HSPA5  | 1.553379 | 0.99763  | 22 | 126.49 | 14.71505 | 15.56066 | 14.91961 | 16.35741 | 15.86375 | 15.96705 |
| <b>P61158</b> | Actin-related protein 3          | ACTR3  | 1.363059 | 1.08742  | 11 | 32.722 | 14.38283 | 13.67937 | 14.89174 | 15.64931 | 15.24481 | 15.32207 |
| <b>Q9H0U4</b> | Ras-related protein Rab-1B       | RAB1B  | 1.426842 | 1.140889 | 7  | 36.248 | 15.7072  | 14.72051 | 14.6625  | 16.46415 | 15.94622 | 16.10251 |
| <b>P13489</b> | Ribonuclease inhibitor           | RNH1   | 1.253269 | 1.229427 | 4  | 11.132 | 10.11048 | 9.931639 | 10.93921 | 11.48472 | 0        | 11.62835 |
| <b>P40227</b> | T-complex protein 1 subunit zeta | CCT6A  | 1.421799 | 1.232392 | 5  | 8.5281 | 10.25136 | 11.46817 | 10.27053 | 11.88023 | 11.95143 | 11.85557 |
|               | Nucleosome assembly protein 1-   |        |          |          |    |        |          |          |          |          |          |          |
| <b>P55209</b> | like 1                           | NAP1L1 | 1.260657 | 1.288467 | 2  | 13.287 | 13.74599 | 13.83368 | 15.22596 | 15.58942 | 15.53898 | 15.54264 |
| <b>P11234</b> | Ras-related protein Ral-B        | RALB   | 1.206523 | 1.410002 | 4  | 6.1192 | 12.44964 | 12.97061 | 11.71643 | 0        | 13.62605 | 13.95174 |
| <b>P29401</b> | Transketolase                    | TKT    | 1.216089 | 1.498017 | 3  | 4.0548 | 0        | 10.21359 | 10.18339 | 12.08348 | 0        | 11.30953 |
| <b>O60610</b> | Protein diaphanous homolog 1     | DIAPH1 | 1.277175 | 2.734471 | 13 | 22.023 | 0        | 8.606442 | 9.923476 | 10.96441 | 12.90834 | 12.12554 |
|               | Superoxide dismutase [Mn],       |        |          |          |    |        |          |          |          |          |          |          |
| <b>P04179</b> | mitochondrial                    | SOD2   | 3.592551 | 3.566264 | 4  | 13.7   | 11.7945  | 11.41891 | 0        | 15.04286 | 15.32024 | 15.15581 |

**Online Supplementary Table S5. Significantly differential proteins at univariate statistical analysis (Volcano Plot) in pooled patients with diabetes (T2DM). A positive value of “Difference” indicates an up-regulation in third tertile respect to first tertile, while a negative value indicates a down-regulation in the same comparison.**

| Protein IDs       | Protein names                                          | Gene names | -LOG(P-value) | Difference | Peptides | Score  | log2 iBAQ               |
|-------------------|--------------------------------------------------------|------------|---------------|------------|----------|--------|-------------------------|-------------------------|-------------------------|-------------------------|-------------------------|-------------------------|
|                   |                                                        |            |               |            |          |        | 3 <sup>rd</sup> tertile | 3 <sup>rd</sup> tertile | 3 <sup>rd</sup> tertile | 1 <sup>st</sup> tertile | 1 <sup>st</sup> tertile | 1 <sup>st</sup> tertile |
|                   |                                                        |            |               |            |          |        | T2DM 01                 | T2DM 02                 | T2DM 03                 | T2DM 01                 | T2DM 02                 | T2DM 03                 |
| <b>P02042</b>     | Hemoglobin subunit delta                               | HBD        | 1.485667      | -1.23763   | 12       | 56.441 | 14.08697                | 13.70271                | 14.92105                | 15.6418                 | 15.58552                | 15.19629                |
| <b>O75915</b>     | PRA1 family protein 3                                  | ARL6IP5    | 1.362992      | -1.13315   | 2        | 19.28  | 14.20533                | 13.84353                | 12.92151                | 14.88832                | 14.65654                | 14.82496                |
| <b>P47755</b>     | F-actin-capping protein subunit<br>alpha-2             | CAPZA2     | 1.907236      | -1.123     | 2        | 6.7226 | 11.48165                | 11.20316                | 10.67384                | 12.28326                | 12.042                  | 12.40237                |
| <b>P01009</b>     | Alpha-1-antitrypsin                                    | SERPINA1   | 1.574752      | -0.94506   | 2        | 31.074 | 11.17636                | 11.09764                | 10.7151                 | 11.54868                | 12.36506                | 11.91053                |
| <b>P40197</b>     | Platelet glycoprotein V                                | GP5        | 1.30206       | -0.77677   | 6        | 35.965 | 12.77569                | 12.31967                | 12.54134                | 13.801                  | 13.18587                | 12.98014                |
| <b>P32119</b>     | Peroxiredoxin-2                                        | PRDX2      | 2.307579      | -0.76107   | 5        | 31.728 | 13.78259                | 13.64959                | 13.40248                | 14.33427                | 14.52099                | 14.26261                |
| <b>P01877</b>     | Ig alpha-2 chain C region                              | IGHA2      | 2.090789      | -0.65005   | 1        | 6.7504 | 10.4292                 | 10.28019                | 10.62571                | 11.19722                | 10.92072                | 11.16729                |
| <b>Q71U36</b>     | Tubulin alpha-1A chain                                 | TUBA1A     | 1.374359      | -0.60008   | 16       | 9.8418 | 11.23829                | 10.81306                | 10.70977                | 11.7608                 | 11.45389                | 11.34668                |
| <b>Q00325</b>     | Phosphate carrier protein,<br>mitochondrial            | SLC25A3    | 2.397486      | -0.56923   | 1        | 7.3322 | 10.81137                | 10.69357                | 10.94017                | 11.31882                | 11.32193                | 11.51205                |
| <b>Q93084</b>     | Sarcoplasmic/endoplasmic<br>reticulum calcium ATPase 3 | ATP2A3     | 1.297035      | -0.46689   | 14       | 143.33 | 14.22362                | 14.07079                | 13.82665                | 14.72542                | 14.49611                | 14.30021                |
| <b>P61026</b>     | Ras-related protein Rab-10                             | RAB10      | 1.439938      | -0.44629   | 4        | 19.822 | 12.94171                | 12.84223                | 13.16101                | 13.50581                | 13.56546                | 13.21256                |
| <b>A0A087WV48</b> | Peptidyl-prolyl cis-trans<br>isomerase FKBP1A          | FKBP1A     | 1.582264      | 0.314351   | 1        | 7.7167 | 13.10617                | 13.36318                | 13.38073                | 12.96842                | 12.93257                | 13.00605                |
| <b>P21926</b>     | CD9 antigen                                            | CD9        | 2.086679      | 0.347439   | 2        | 11.463 | 14.79563                | 14.76523                | 14.94105                | 14.43111                | 14.57831                | 14.45018                |

|               |                                                          |        |          |          |    |        |          |          |          |          |          |          |
|---------------|----------------------------------------------------------|--------|----------|----------|----|--------|----------|----------|----------|----------|----------|----------|
| <b>P11021</b> | 78 kDa glucose-regulated protein                         | HSPA5  | 2.371004 | 0.385367 | 14 | 95.684 | 14.86104 | 14.86868 | 14.79609 | 14.41283 | 14.57837 | 14.3785  |
| <b>P11142</b> | Heat shock cognate 71 kDa protein                        | HSPA8  | 1.890217 | 0.39384  | 17 | 128.76 | 15.40171 | 15.65749 | 15.52616 | 15.02484 | 15.19568 | 15.18332 |
| <b>P09486</b> | SPARC                                                    | SPARC  | 1.325489 | 0.39593  | 4  | 30.946 | 15.64329 | 15.3549  | 15.20201 | 15.09959 | 14.99643 | 14.91639 |
| <b>P06703</b> | Protein S100-A6                                          | S100A6 | 1.478966 | 0.402231 | 1  | 6.0352 | 13.07494 | 0        | 13.29519 | 12.68753 | 12.788   | 12.87298 |
| <b>P14770</b> | Platelet glycoprotein IX                                 | GP9    | 1.647101 | 0.413659 | 4  | 29.441 | 15.80735 | 15.66069 | 15.77316 | 15.17094 | 15.53162 | 15.29767 |
| <b>P19105</b> | Myosin regulatory light chain 12A                        | MYL12A | 1.475887 | 0.425207 | 8  | 84.722 | 17.65425 | 17.72507 | 17.58152 | 17.34906 | 16.97455 | 17.36162 |
| <b>P61224</b> | Ras-related protein Rap-1b                               | RAP1B  | 1.345179 | 0.486839 | 10 | 88.933 | 17.68414 | 17.37101 | 17.82637 | 17.34577 | 17.03596 | 17.03928 |
| <b>P30101</b> | Protein disulfide-isomerase A3                           | PDIA3  | 1.477568 | 0.506003 | 6  | 40.336 | 13.37545 | 13.65508 | 13.15477 | 13.00692 | 12.78195 | 12.87842 |
| <b>P06753</b> | Tropomyosin alpha-3 chain                                | TPM3   | 1.351964 | 0.510431 | 11 | 63.08  | 15.52506 | 15.46531 | 15.33696 | 15.08986 | 15.10906 | 14.59712 |
| <b>Q14766</b> | Latent-transforming growth factor beta-binding protein 1 | LTBP1  | 1.924697 | 0.51086  | 12 | 96.839 | 12.99327 | 12.7426  | 12.85722 | 12.48902 | 12.39218 | 12.17932 |
| <b>P01834</b> | Ig kappa chain C region                                  | IGKC   | 2.657308 | 0.559691 | 1  | 7.796  | 13.25441 | 13.36932 | 13.51015 | 12.75776 | 12.84015 | 12.85689 |
| <b>Q9UBW5</b> | Bridging integrator 2                                    | BIN2   | 1.300584 | 0.563637 | 8  | 51.553 | 13.58848 | 14.01498 | 13.77982 | 13.44061 | 13.33818 | 12.91358 |
| <b>P10124</b> | Serglycin                                                | SRGN   | 2.25759  | 0.569873 | 2  | 20.092 | 15.6434  | 15.67777 | 15.55597 | 14.98686 | 14.93111 | 15.24956 |
| <b>P62491</b> | Ras-related protein Rab-11A                              | RAB11A | 1.239257 | 0.610461 | 4  | 29.32  | 14.61896 | 14.54243 | 14.53491 | 14.35218 | 13.95647 | 13.55627 |
| <b>Q9NZN3</b> | EH domain-containing protein 3                           | EHD3   | 1.691269 | 0.683522 | 10 | 73.056 | 14.34935 | 13.89945 | 13.85565 | 13.52906 | 13.21193 | 13.31288 |
| <b>P10809</b> | 60 kDa heat shock protein, mitochondrial                 | HSPD1  | 1.801825 | 0.692291 | 4  | 27.759 | 12.35508 | 11.79576 | 12.12069 | 11.51062 | 11.36008 | 11.32396 |
| <b>P09493</b> | Tropomyosin alpha-1 chain                                | TPM1   | 2.366772 | 0.721876 | 7  | 6.4116 | 11.78324 | 11.6475  | 11.86213 | 11.14275 | 11.15526 | 10.82925 |
| <b>P06744</b> | Glucose-6-phosphate isomerase                            | GPI    | 1.218757 | 0.781909 | 2  | 12.827 | 10.86751 | 11.75121 | 11.7309  | 10.8157  | 10.6359  | 10.55229 |
| <b>P78417</b> | Glutathione S-transferase omega-                         | GSTO1  | 1.145498 | 0.792027 | 5  | 30.831 | 14.34748 | 14.42947 | 14.20358 | 13.89851 | 13.80564 | 12.9003  |

|               |                                                        |          |          |          |   |        |          |          |          |          |          |          |
|---------------|--------------------------------------------------------|----------|----------|----------|---|--------|----------|----------|----------|----------|----------|----------|
| <b>P09211</b> | Glutathione S-transferase P                            | GSTP1    | 1.654674 | 1.026776 | 3 | 21.064 | 14.82063 | 14.62445 | 14.0612  | 13.72973 | 13.53782 | 13.1584  |
| <b>P10720</b> | Platelet factor 4 variant                              | PF4V1    | 2.258485 | 1.125004 | 3 | 38.881 | 14.25274 | 14.58959 | 14.52326 | 13.02649 | 13.64611 | 13.31798 |
| <b>P0DP25</b> |                                                        |          | 1.418752 | 1.156385 | 3 | 18.644 | 15.72355 | 15.71473 | 15.74405 | 15.32952 | 14.21021 | 14.17344 |
| <b>P04632</b> | Calpain small subunit 1                                | CAPNS1   | 2.16573  | 1.166851 | 3 | 21.31  | 13.11399 | 12.97302 | 13.41389 | 11.9115  | 12.35824 | 11.7306  |
| <b>O15144</b> | Actin-related protein 2/3 complex<br>subunit 2         | ARPC2    | 2.560653 | 1.274261 | 6 | 35.028 | 12.30318 | 12.80613 | 12.29809 | 11.07808 | 11.38306 | 11.12348 |
| <b>P07237</b> | Protein disulfide-isomerase                            | P4HB     | 1.661223 | 1.309026 | 5 | 31.242 | 12.37648 | 12.74201 | 12.8865  | 11.75104 | 11.61305 | 10.71382 |
| <b>Q13561</b> | Dynactin subunit 2                                     | DCTN2    | 1.801636 | 1.312723 | 2 | 12.557 | 12.29769 | 11.72626 | 11.85981 | 10.84101 | 10.45605 | 0        |
| <b>P09972</b> | Fructose-bisphosphate aldolase C                       | ALDOC    | 1.194812 | 1.396106 | 3 | 8.3192 | 13.33762 | 0        | 12.77604 | 11.36271 | 12.33829 | 11.28118 |
| <b>P30740</b> | Leukocyte elastase inhibitor                           | SERPINB1 | 1.061225 | 1.397216 | 7 | 41.743 | 13.28944 | 13.97127 | 13.84931 | 12.00748 | 11.48109 | 13.4298  |
| <b>Q01813</b> | ATP-dependent 6-<br>phosphofructokinase, platelet type | PFKP     | 1.737466 | 1.69225  | 3 | 17.686 | 11.95815 | 11.64273 | 0        | 10.596   | 10.03974 | 9.688828 |

**Online Supplementary Table S6. Characteristics of patients with and without type 2 diabetes analyzed for MK and proplatelet studies in relation to tertiles of sTXB<sub>2</sub> recovery slope.**

|                                             | noT2DM 1 <sup>st</sup> tertile | noT2DM 3 <sup>rd</sup> tertile | P value | T2DM 1 <sup>st</sup> tertile | T2DM 3 <sup>rd</sup> tertile | P value |
|---------------------------------------------|--------------------------------|--------------------------------|---------|------------------------------|------------------------------|---------|
| N.                                          | 4                              | 6                              |         | 4                            | 5                            |         |
| Age – years                                 | 58.0 (44.3-73.3)               | 66.5 (53.8-68.0)               | 0.521   | 67.0 (60.8-73.3)             | 68.0 (60.5-70.0)             | 0.902   |
| Male gender, n. (%)                         | 3 (75)                         | 4 (66)                         | 1.000   | 2 (50)                       | 4 (20)                       | 0.524   |
| Weight – Kg                                 | 72.0 (51.0-98.3)               | 79.5 (68.8-107.0)              | 0.522   | 82.5 (74.3-93.8)             | 100.0 (84.5-101.5)           | 0.110   |
| BMI - Kg/m <sup>2</sup>                     | 25.4 (20.3-33.4)               | 27.0 (25.6-33.9)               | 0.522   | 30.2 (26.8-37.0)             | 32.2 (30.9-34.8)             | 0.462   |
| Waist circumference – cm                    | 96.5 (79.3-116.8)              | 103.5 (98.0-117.3)             | 0.240   | 103.5 (90.8-121.5)           | 107.0 (106.5-116.0)          | 0.621   |
| WHR                                         | 0.97 (0.86-1.07)               | 0.99 (0.96-1.01)               | 0.667   | 0.92 (0.88-0.98)             | 0.97 (0.95-1.02)             | 0.110   |
| Obesity, n. (%)                             | 1 (25)                         | 2 (33)                         | 1.000   | 2 (50)                       | 5 (100)                      | 0.167   |
| Systolic arterial pressure – mmHg           | 128.5 (113.8-168.0)            | 155.0 (140.5-167.3)            | 0.201   | 143.0 (135.5-152.8)          | 148.0 (137.0-170.0)          | 0.461   |
| Diastolic arterial pressure – mmHg          | 78.0 (63.0-90.0)               | 88.5 (84.3-94.0)               | 0.281   | 75.5 (70.8-79.5)             | 79.0 (74.5-83.5)             | 0.327   |
| Hypertension, n. (%)                        | 2 (50)                         | 6 (100)                        | .133    | 3 (75)                       | 4 (20)                       | 1.000   |
| Glycated hemoglobin - mmol/mol              | 39 (36-44)                     | 39 (33-45)                     | 0.747   | 53 (41-72)                   | 56 (50-64)                   | 0.461   |
| Glycated hemoglobin - %                     | 5.7 (5.4-6.2)                  | 5.7 (5.2-6.3)                  | 0.747   | 7.0 (5.9-8.7)                | 7.3 (6.7-8.0)                | 0.461   |
| Dyslipidemia, n. (%)                        | 2 (50)                         | 3 (50)                         | 1.000   | 4 (100)                      | 4 (20)                       | 1.000   |
| AST - U/L                                   | 30.0 (21.0-42.8)               | 27.0 (21.3-31.8)               | 0.669   | 20.5 (16.8-25.8)             | 25.0 (20.0-26.0)             | 0.537   |
| ALT - U/L                                   | 43.0 (30.5-54.0)               | 31.0 (27.0-38.3)               | 0.240   | 28.0 (19.8-37.8)             | 32.0 (26.5-41.5)             | 0.268   |
| Total Bilirubin – umol/L                    | 0.65 (0.50-0.88)               | 0.95 (0.55-1.20)               | 0.333   | 0.50 (0.43-0.88)             | 0.60 (0.45-0.60)             | 0.702   |
| NAFLD, n. (%)                               | 4 (100)                        | 3 (50)                         | .444    | 3 (75)                       | 5 (100)                      | .126    |
| hs-C-reactive protein – nmol/L              | 0.27 (0.07-0.60)               | 0.23 (0.06-0.40)               | 0.670   | 0.08 (0.05-0.30)             | 0.23 (0.09-0.29)             | 0.389   |
| Red Blood Cell count, x10 <sup>12</sup> /L  | 4.8 (4.5-5.0)                  | 5.4 (4.7-5.5)                  | 0.219   | 4.6 (4.5-4.7)                | 4.7 (4.3-4.9)                | 0.624   |
| Hemoglobin – g/dL                           | 14 (14-15)                     | 15 (14-16)                     | 0.806   | 13 (13-14)                   | 14 (13-15)                   | 0.142   |
| Hematocrit – %                              | 43 (42-45)                     | 45 (42-48)                     | 0.221   | 39 (38-41)                   | 41 (40-42)                   | 0.142   |
| Red cell Distribution Width – %             | 13.7 (12.5-14.3)               | 14.3 (12.9-14.8)               | 0.387   | 14.1 (13.7-14.4)             | 13.2 (13.2-13.6)             | 0.026   |
| Platelet count – 10 <sup>9</sup> /L         | 201 (138-348)                  | 224 (213-229)                  | 1.000   | 230 (169-241)                | 228 (194-259)                | 1.000   |
| Platelet Distribution Width – fL            | 13.6 (10.8-16.8)               | 14.7 (13.5-15.0)               | 0.461   | 12.5 (11.6-15.2)             | 15.3 (12.9-16.1)             | 0.221   |
| Mean Platelet Volume – fL                   | 11.6 (9.7-12.7)                | 11.7 (11.1-11.8)               | 0.806   | 10.7 (10.1-11.9)             | 11.7 (10.9-16.6)             | 0.176   |
| White Blood Cell count – 10 <sup>9</sup> /L | 6.44 (5.08-8.81)               | 7.02 (5.27-9.58)               | 0.624   | 6.36 (4.68-9.26)             | 6.22 (5.52-6.76)             | 0.806   |
| Fasting plasma glucose – mmol/L             | 86.5 (77.8-100.5)              | 90.5 (86.8-104.3)              | 0.454   | 130.0 (96.0-150.5)           | 130.0 (110.5-147.5)          | 0.806   |
| Fasting plasma Insulin – pmol/L             | 10.2 (7.27-10.37)              | 10.2 (7.67-20.57)              | 0.67    | 6.4 (4.5-12.57)              | 14.2 (11.8-23.85)            | 0.086   |
| HOMA-IR                                     | 2.21 (1.4-3.33)                | 2.45 (1.69-4.97)               | 0.67    | 2.32 (1.43-2.99)             | 4.8 (3.81-7.1)               | 0.014   |
| Serum Creatinine – umol/L                   | 61.6 (48.4-88.0)               | 74.8 (66.0-96.8)               | 0.190   | 83.6 (52.8-83.6)             | 79.2 (55.4-83.6)             | 0.537   |
| eGFR – ml/min                               | 109.5 (73.5-126.1)             | 90.8 (74.4-102.0)              | 0.394   | 91.0 (79.8-97.8)             | 87.0 (82.4-104.0)            | 0.806   |

|                                                            |                     |                     |       |                     |                     |       |
|------------------------------------------------------------|---------------------|---------------------|-------|---------------------|---------------------|-------|
| Uric Acid – umol/L                                         | 285.5 (279.6-297.4) | 333.1 (237.9-535.3) | 0.453 | 321.1 (243.9-362.8) | 327.1 (303.3-440.1) | 0.624 |
| <b>Cardiovascular disease, n. (%)</b>                      | 2 (50)              | 2 (33)              | 1.000 | 2 (50)              | 4 (20)              | 0.524 |
| Stable CAD                                                 | 0 (0)               | 0 (0)               |       | 1 (25)              | 1 (20)              | 1.000 |
| Carotid stenosis (>50%)                                    | 0 (0)               | 2 (33)              | 0.467 | 0 (0)               | 2 (40)              | 0.444 |
| MI or revascularization                                    | 1 (25)              | 0 (0)               | 0.400 | 1 (25)              | 1 (20)              | 1.000 |
| Stroke, TIA or revascularization                           | 1 (25)              | 1 (16)              | 1.000 | 1 (25)              | 1 (20)              | 1.000 |
| Peripheral artery disease                                  | 0 (0)               | 0 (0)               |       | 1 (25)              | 0 (0)               | 0.444 |
| <b>Therapy, n. (%)</b>                                     |                     |                     |       |                     |                     |       |
| Metformin                                                  | 0 (0)               | 0 (0)               | -     | 4 (100)             | 3 (60)              | 0.444 |
| Glinide                                                    | 0 (0)               | 0 (0)               | -     | 1 (25)              | 1 (20)              | 1.000 |
| PPAR- $\gamma$ agonists                                    | 0 (0)               | 0 (0)               | -     | 1 (25)              | 1 (20)              | 1.000 |
| Sulfonylurea                                               | 0 (0)               | 0 (0)               | -     | 0 (0)               | 0 (0)               | -     |
| Insulin                                                    | 0 (0)               | 0 (0)               | -     | 0 (0)               | 0 (0)               | -     |
| sGLT2 inhibitors                                           | 0 (0)               | 0 (0)               | -     | 0 (0)               | 1 (20)              | 1.000 |
| GLP-1 RA                                                   | 0 (0)               | 0 (0)               | -     | 0 (0)               | 0 (0)               | -     |
| DPP-IV                                                     | 0 (0)               | 0 (0)               | -     | 1 (25)              | 0 (0)               | 0.444 |
| Acarbose                                                   | 0 (0)               | 0 (0)               | -     | 0 (0)               | 0 (0)               | -     |
| ACE-I                                                      | 1 (25)              | 1 (16)              | 1.000 | 0 (0)               | 1 (20)              | -     |
| ARBs                                                       | 1 (25)              | 2 (33)              | 1.000 | 1 (25)              | 2 (40)              | 1.000 |
| Diuretics                                                  | 0 (0)               | 1 (16)              | 1.000 | 0 (0)               | 2 (40)              | 0.444 |
| $\beta$ -blockers                                          | 1 (25)              | 5                   | 0.190 | 2 (50)              | 2 (40)              | 1.000 |
| CCA                                                        | 1 (25)              | 1 (16)              | 1.000 | 2 (50)              | 1 (20)              | 0.524 |
| Other antihypertensives                                    |                     |                     |       |                     |                     | -     |
| Statins                                                    | 2 (50)              | 3 (50)              | 1.000 | 3 (75)              | 1 (20)              | 0.206 |
| Fibrates                                                   | 0 (0)               | 0 (0)               | -     | 0 (0)               | 0 (0)               | -     |
| Ezetimibe                                                  | 0 (0)               | 0 (0)               | -     | 0 (0)               | 0 (0)               | -     |
| Omega 3                                                    | 0 (0)               | 0 (0)               | -     | 1 (25)              | 0 (0)               | 0.444 |
| Proton Pump Inhibitors                                     | 3 (75)              | 3 (50)              | 0.571 | 1 (25)              | 1 (20)              | 1.000 |
| ASA                                                        | 4 (100)             | 6 (100)             | 1.000 | 4 (100)             | 5 (100)             | -     |
| sTXB <sub>2</sub> T0                                       | 3.20 (1.17-5.56)    | 12.74 (8.31-18.06)  | 0.055 | 1.42 (1.05-2.50)    | 4.88 (3.76-12.77)   | 0.014 |
| sTXB <sub>2</sub> T10                                      | 1.57 (0.35-2.47)    | 3.53 (1.56-5.16)    | 0.088 | 0.88 (0.47-1.52)    | 1.99 (1.93-5.48)    | 0.014 |
| sTXB <sub>2</sub> T24                                      | 2.71 (0.95-3.49)    | 7.72 (5.37-11.46)   | 0.011 | 1.51 (1.26-2.58)    | 5.83 (5.12-13.91)   | 0.014 |
| Slope_sTXB <sub>2</sub> ngmL <sup>-1</sup> h <sup>-1</sup> | 0.07 (0.03-0.09)    | 0.270.25-0.51)      | 0.011 | 0.05 (0.04-0.08)    | 0.28 (0.22-0.60)    | 0.014 |

*Reference range of “normal values”:* AST, 5-34 U/L; ALT, 0-55 U/L; hs-C-reactive protein, 0-47.62 nmol/L; Platelet count, 150-450 x10<sup>9</sup>/L; Total cholesterol, 0.0-5.17 mmol/L; HDL cholesterol, 1.03-1.55 mmol/L; Triglycerides, 0-1.69 mmol/L; Fasting plasma glucose, 4.61-6.11 mmol/L; Serum Creatinine, 50.2-97.7 umol/L; Fasting plasma glucose, 3.9-5.5 mmol/L; eGFR, >60 mL/min.

*Abbreviations:* BMI= body mass index, WHR= Waist to Hip ratio, HDL= high-density lipoproteins, AST= Aspartate Aminotransferase, ALT= Alanine amino Transferase, NAFLD= non alcoholic fatty liver disease, HOMA-IR= Homeostatic Model Assessment of Insulin Resistance, eGFR= estimated glomerular filtration rate, CAD= coronary artery disease, CCA= Common carotid artery, MI= myocardial infarction, TIA= transient ischemic attack, PPAR- $\gamma$ = peroxisome proliferator-activated receptor gamma, SGLT2= Sodium-glucose co-transporter-2, GLP1 RA= glucagon-like peptide 1 receptor agonist, DPP-IV= dipeptidyl peptidase IV, ACE-I= angiotensin-converting-enzyme -inhibitors, ARBs= angiotensin receptor blockers, CCA= calcium channel antagonists, ASA= acetylsalicylic acid.

Data are median (25th – 75th percentile). †Determined by Kruskal-Wallis or Mann-Whitney or Chi Square test, as appropriate.



**Online Supplementary Table S7. Correlations between sTXB<sub>2</sub> recovery slope and clinical variables in patients with and without type 2 diabetes mellitus.**

---

| <b>T2DM</b>                   |                       |                      |                      |                      |
|-------------------------------|-----------------------|----------------------|----------------------|----------------------|
|                               | <b>Age</b>            | <b>BMI</b>           | <b>WC</b>            | <b>eGFR</b>          |
| <b>sTXB<sub>2</sub> slope</b> | rho=-0.215<br>p=0.030 | rho=0.217<br>p=0.027 | rho=0.229<br>p=0.020 | rho=0.256<br>p=0.009 |
| <b>noT2DM</b>                 |                       |                      |                      |                      |
|                               | <b>Weight</b>         | <b>WHR</b>           | <b>WC</b>            | <b>DAP</b>           |
| <b>sTXB<sub>2</sub> slope</b> | rho=0.217<br>p=0.029  | rho=0.267<br>p=0.007 | rho=0.211<br>p=0.034 | rho=0.227<br>p=0.022 |

---

*Abbreviations:* BMI=body mass index; WC=waist circumference; eGFR=estimated glomerular filtration rate; WHR=waist-to-hip ratio; DAP=diastolic arterial pressure.

Spearman correlation coefficient and p-value are reported.
